# Supplementary material for: Ion’s ring current: regularities of the energy density distributions on the main phase of geomagnetic storms
Source: Copernicus journal article supplement (doi:10.5194/angeo-2023-10), 2023-03-28

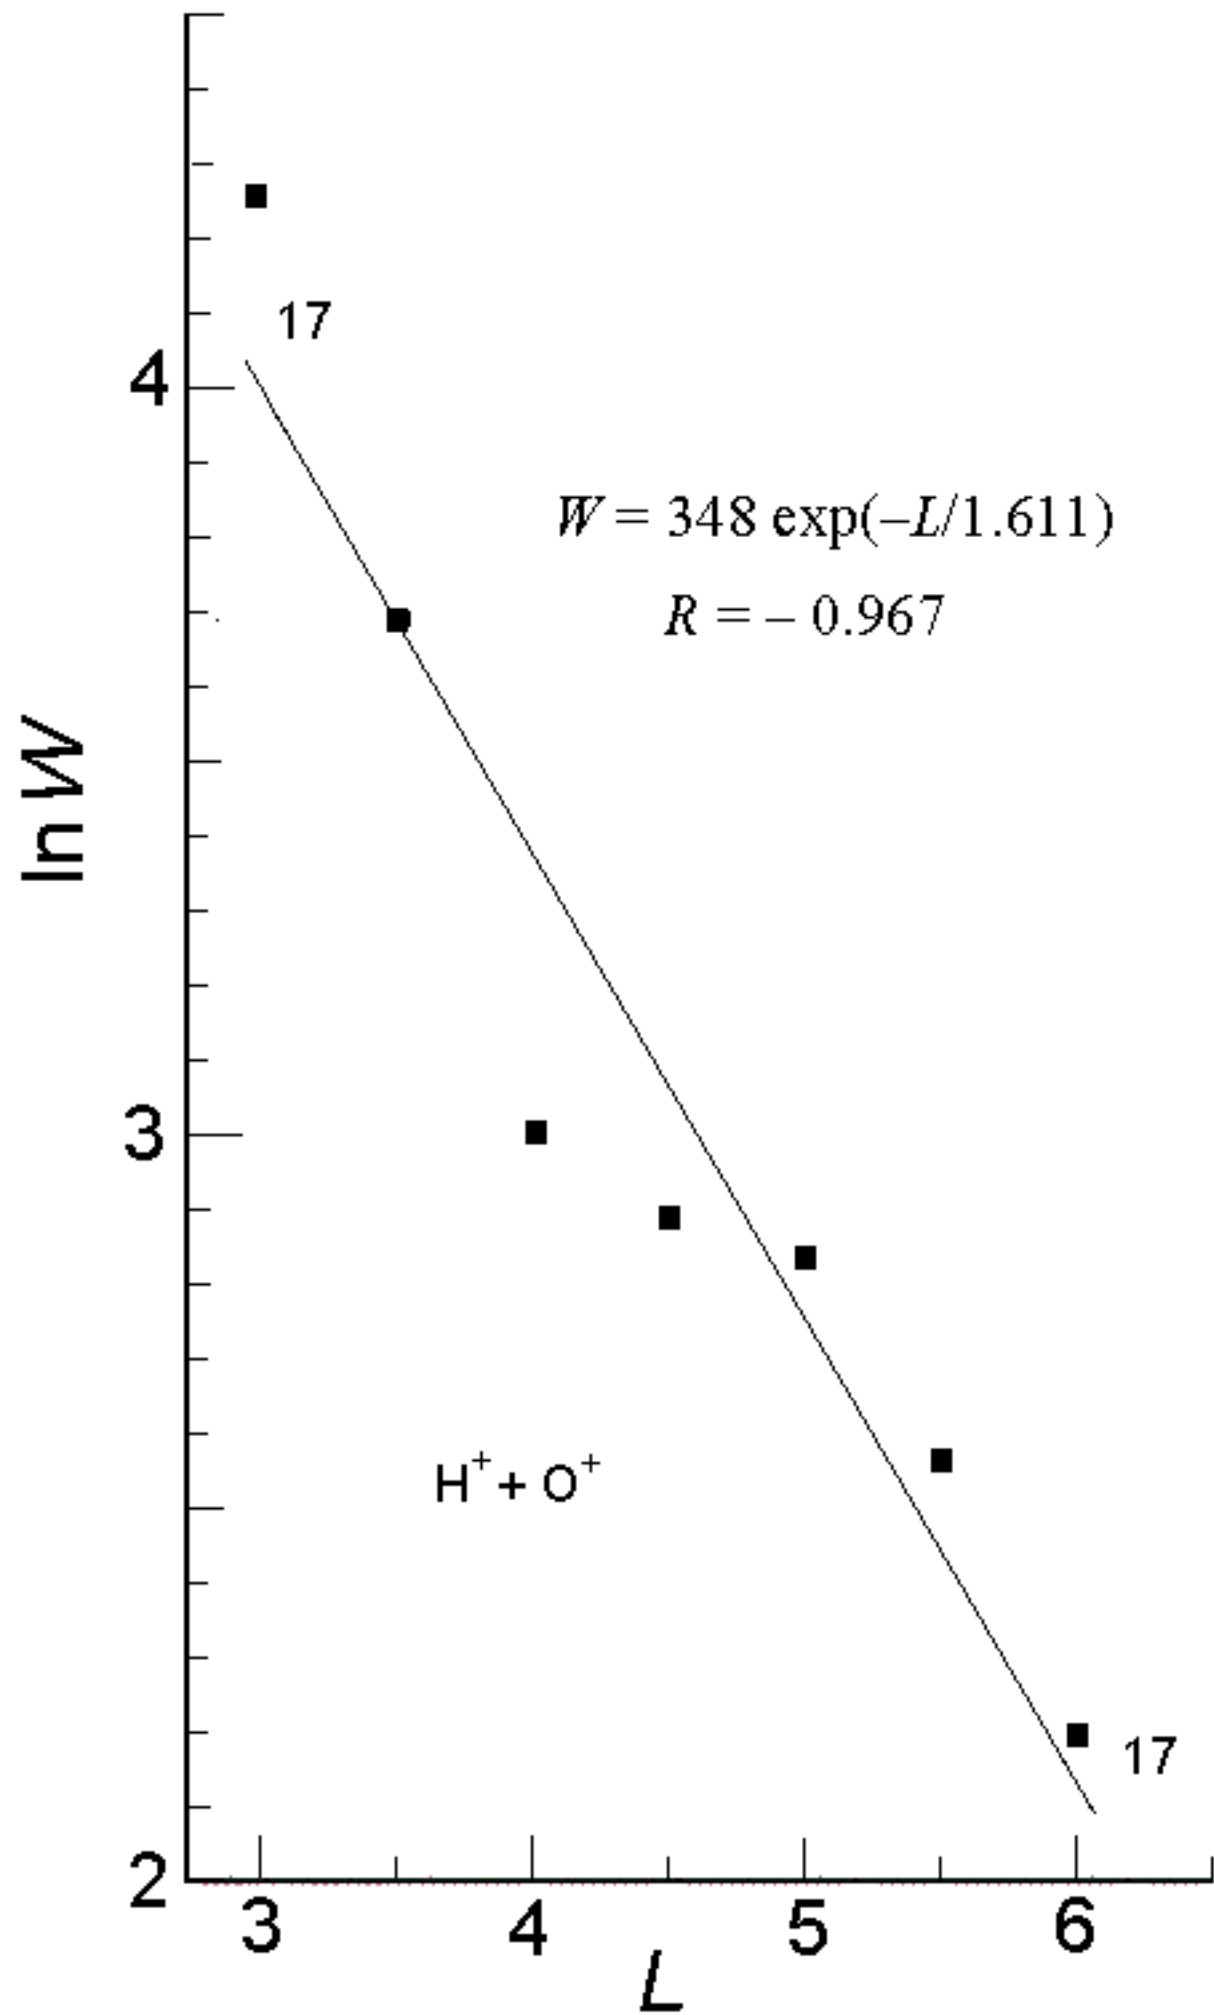

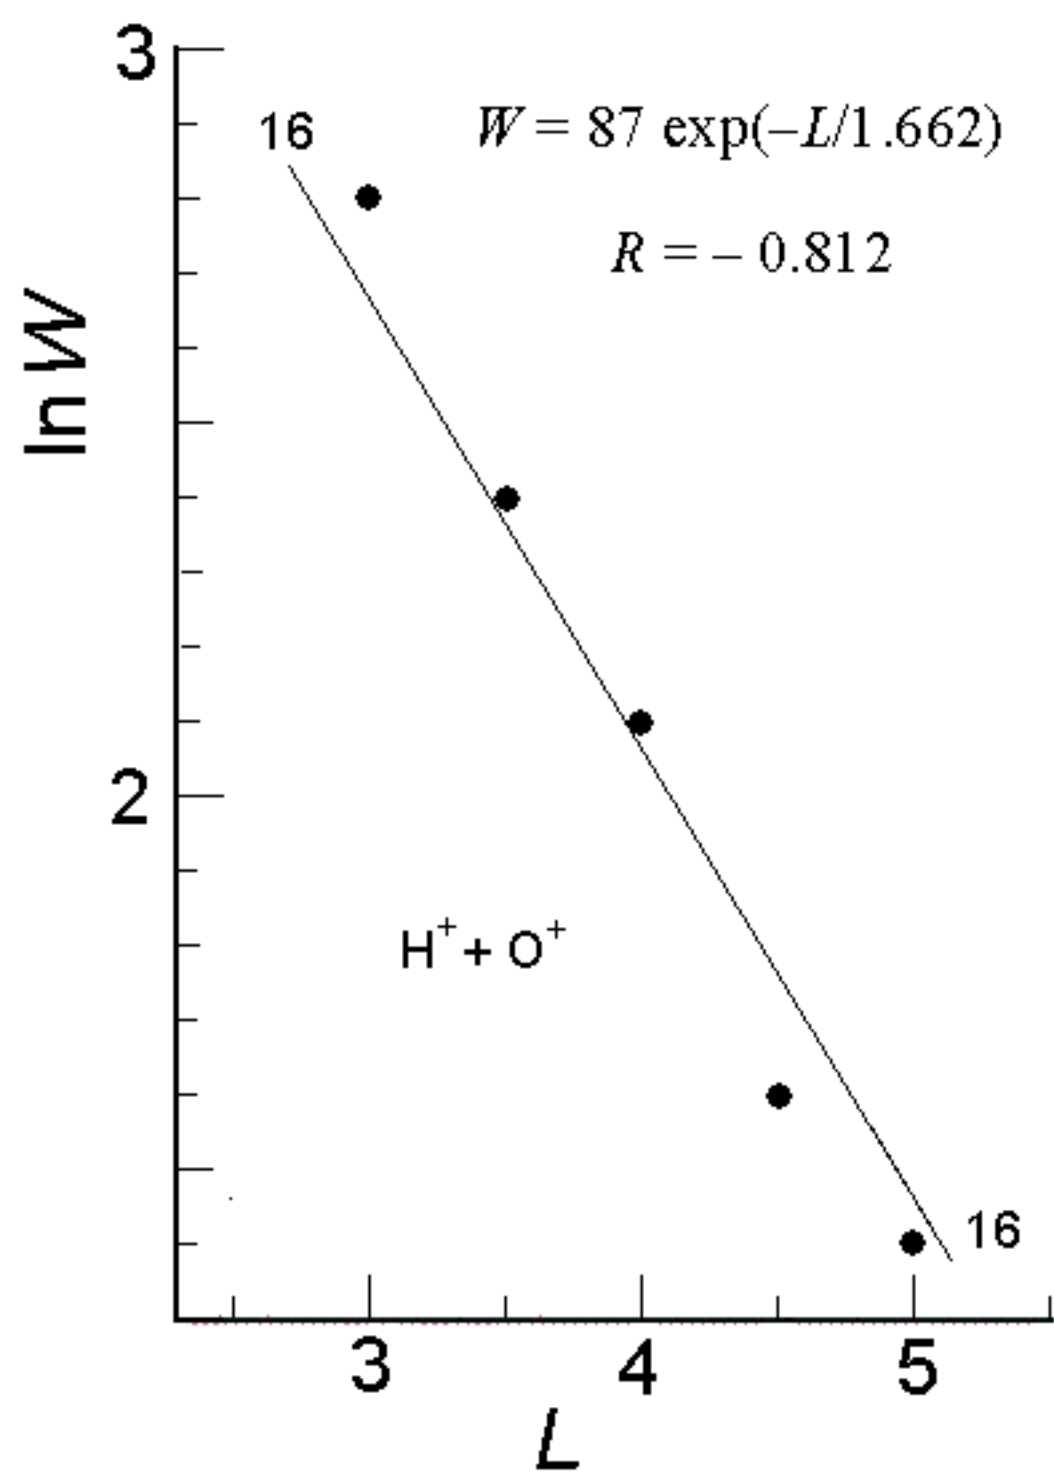

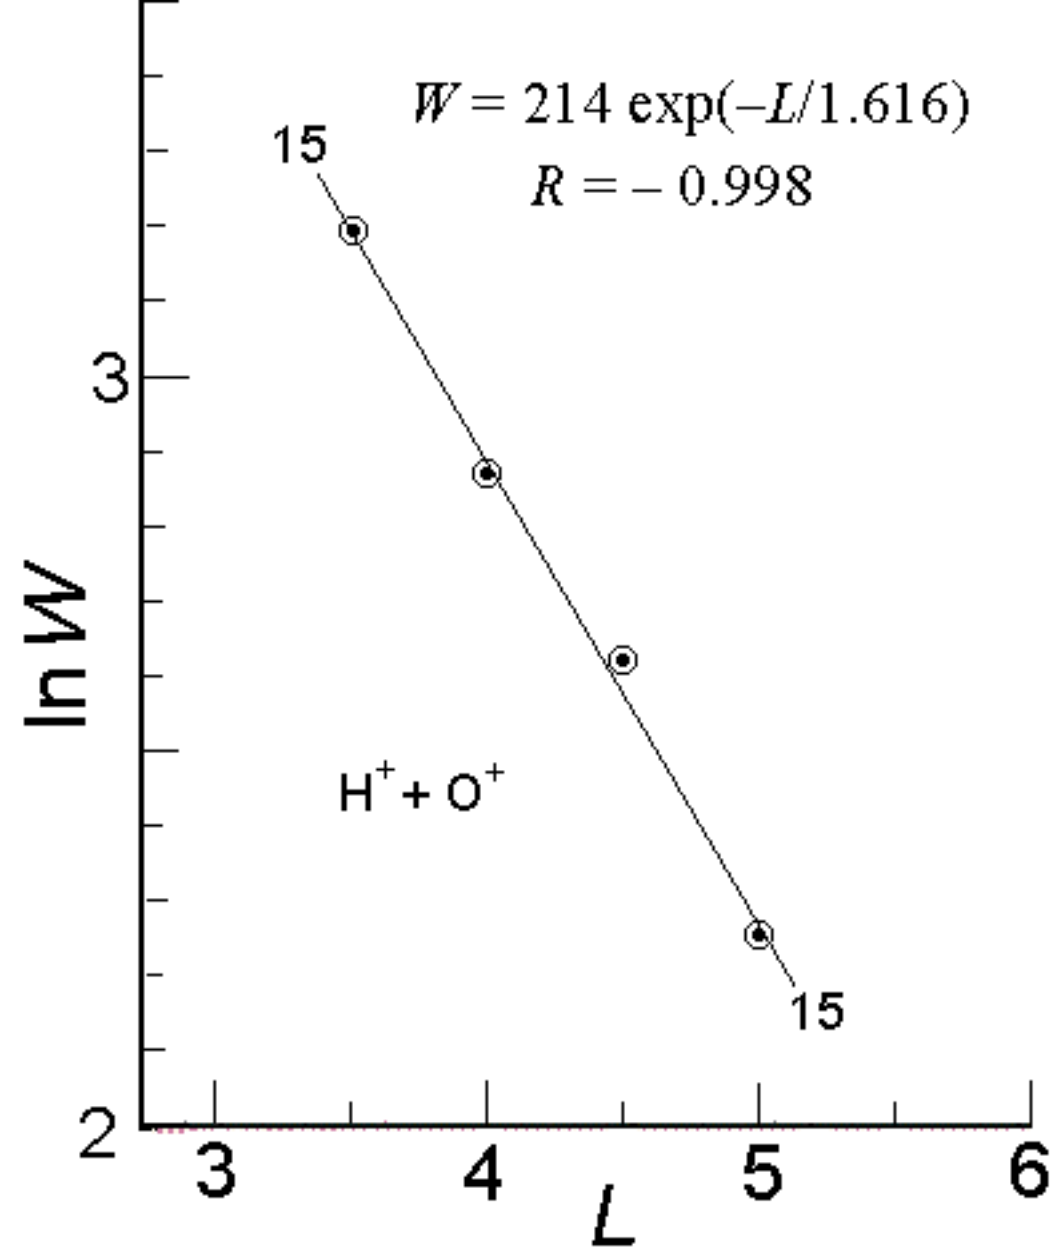

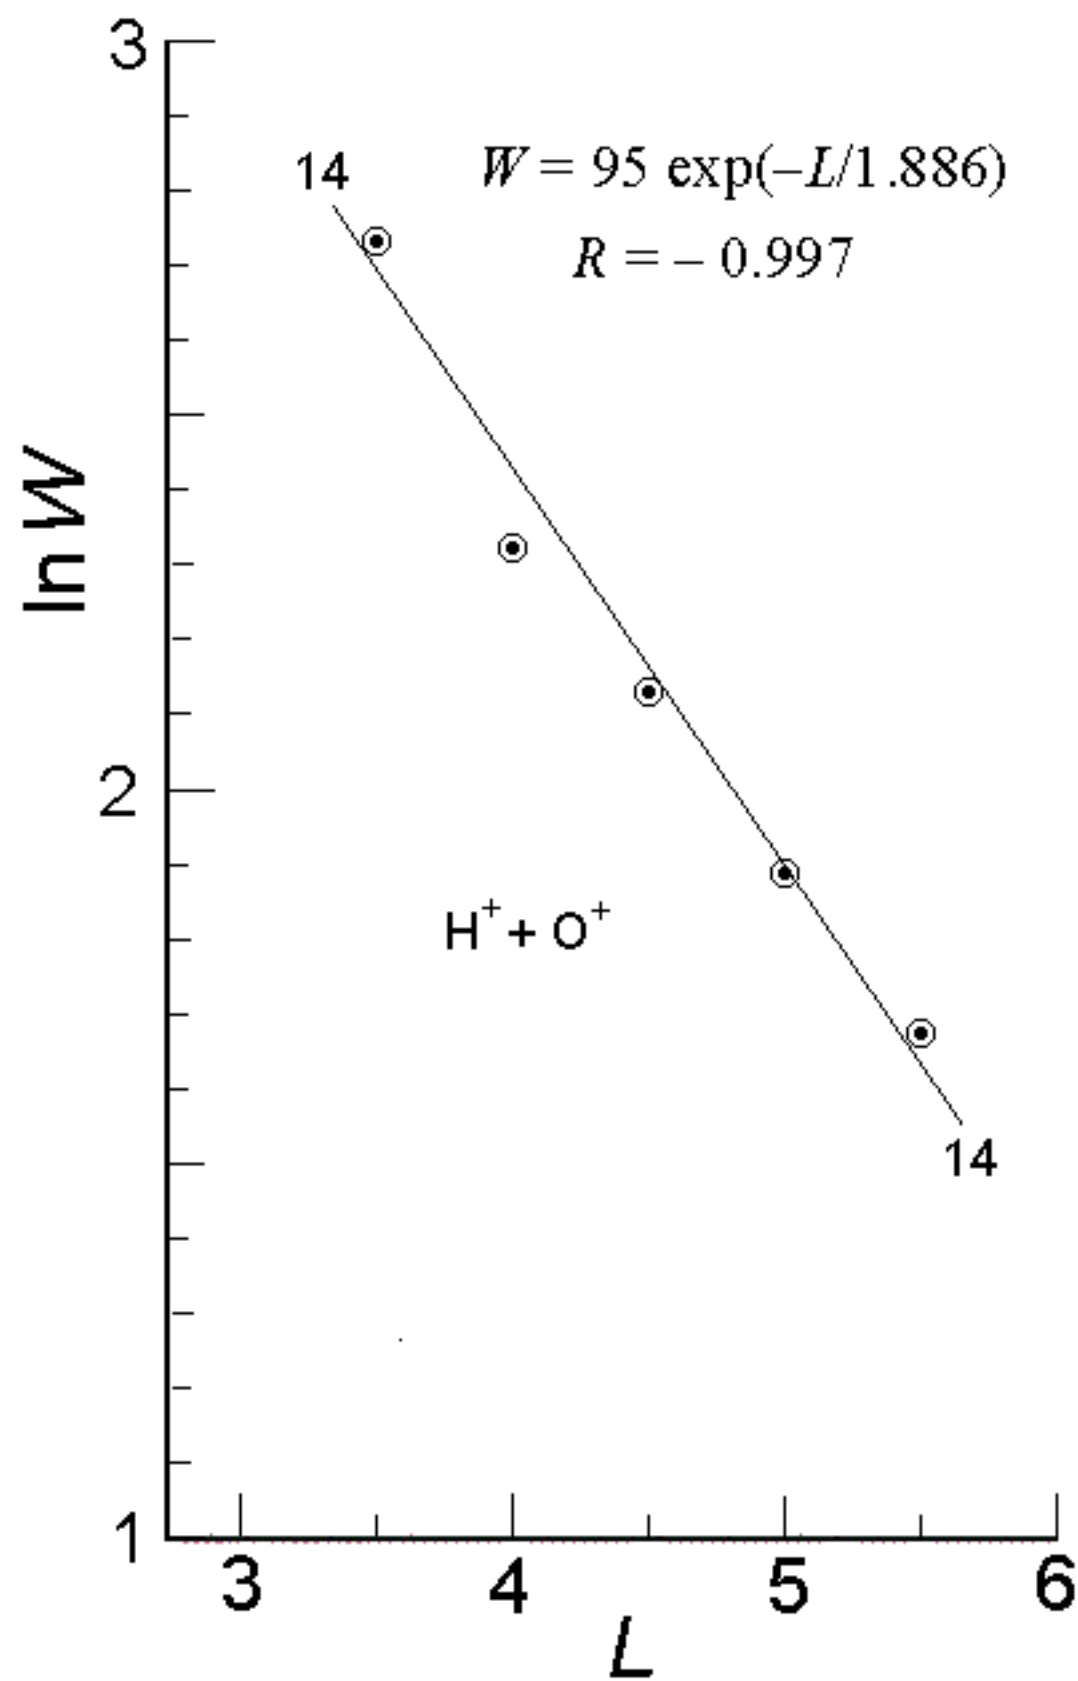

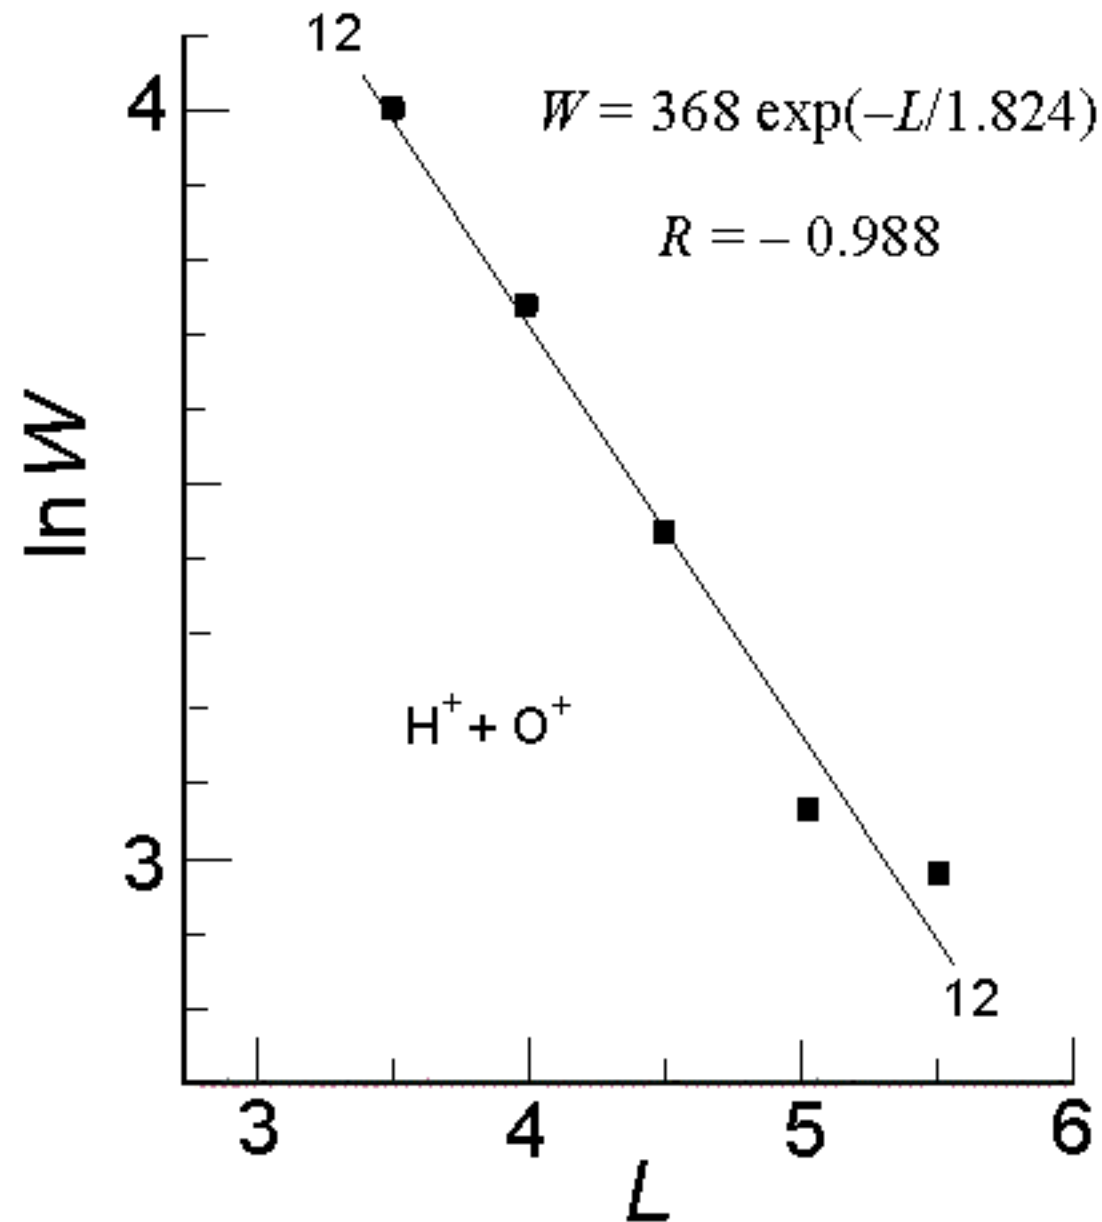

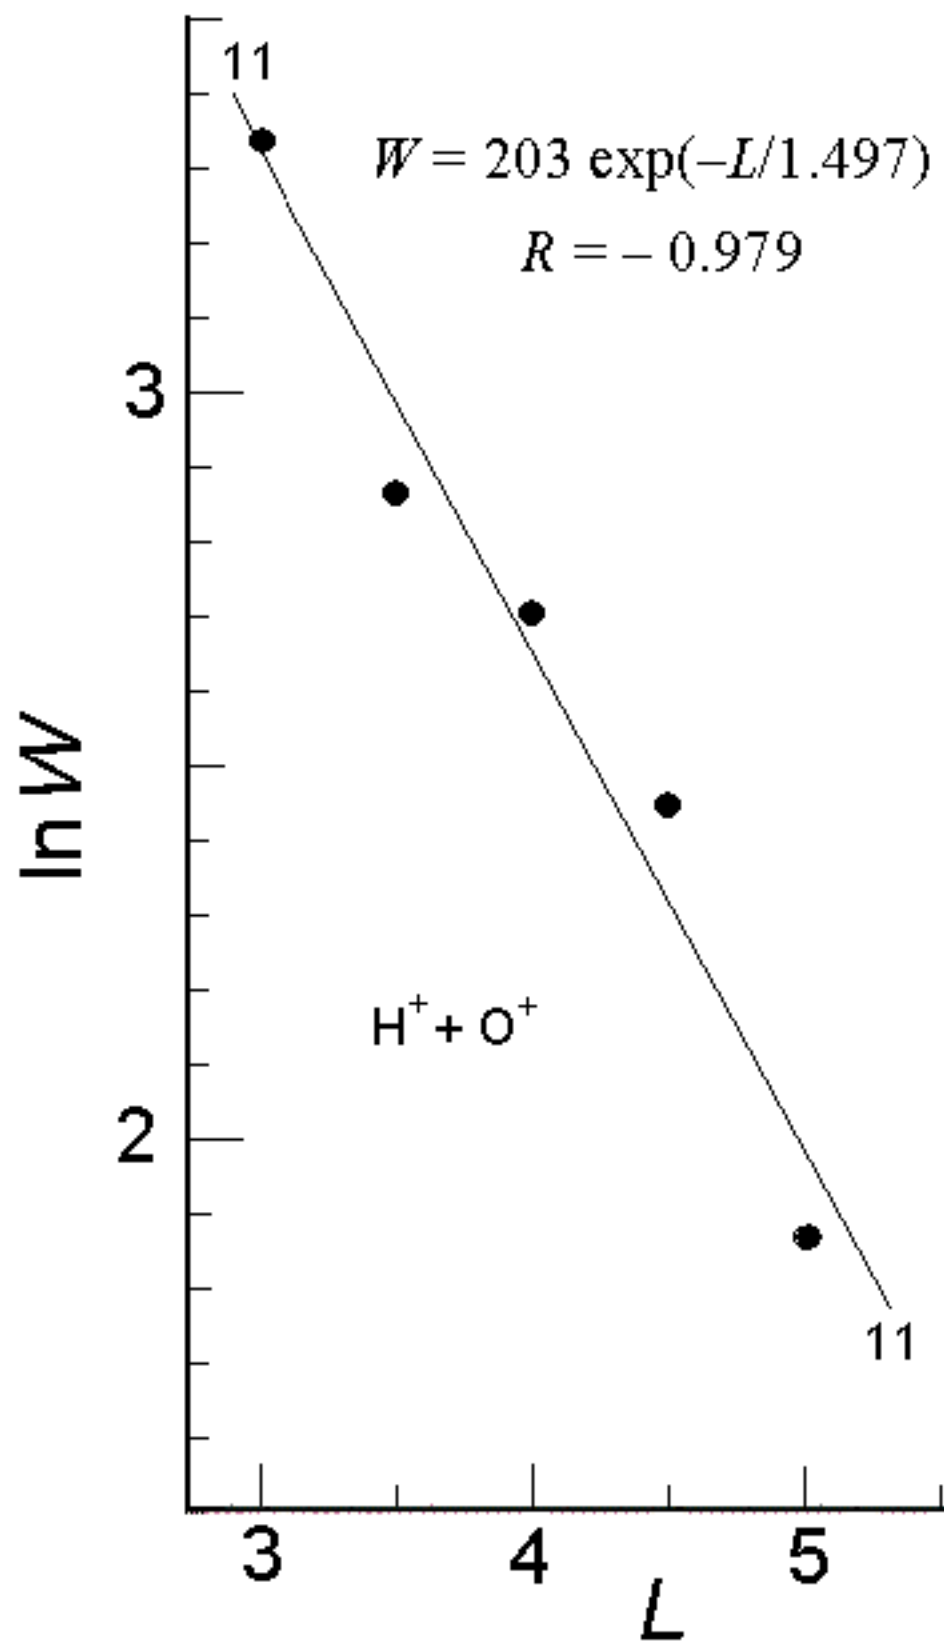

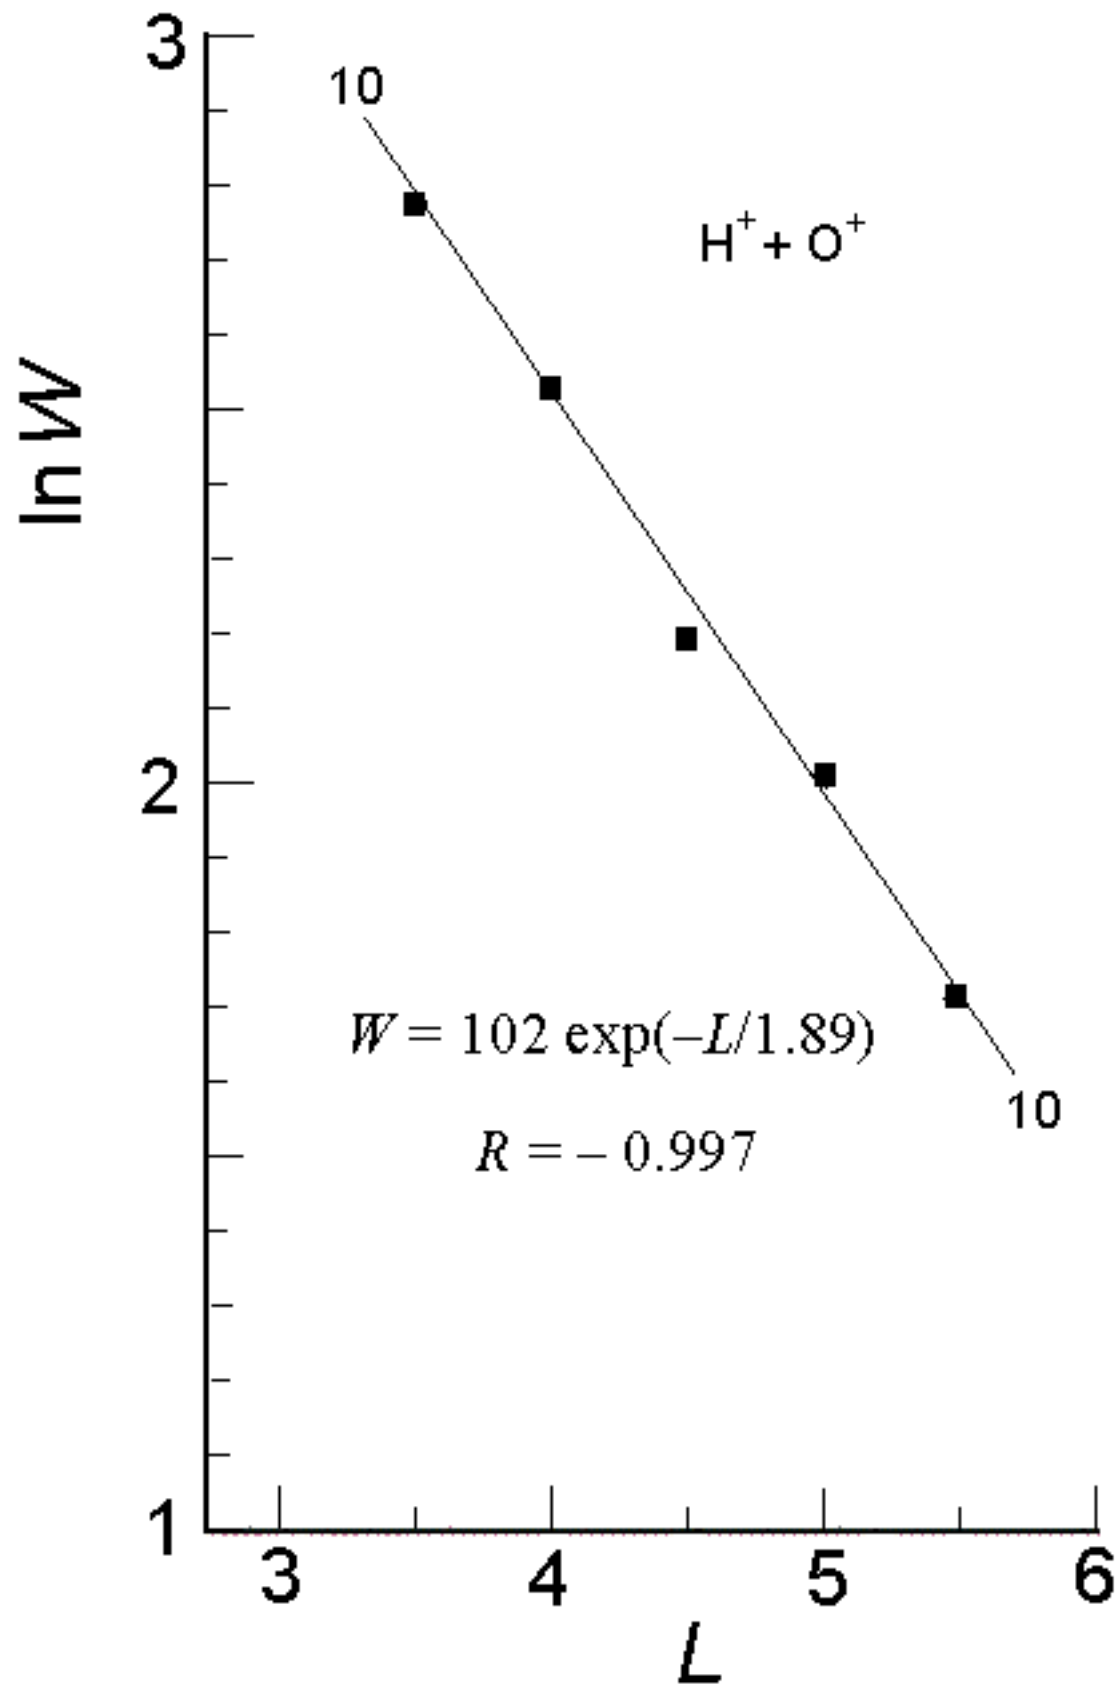

$\ln W$

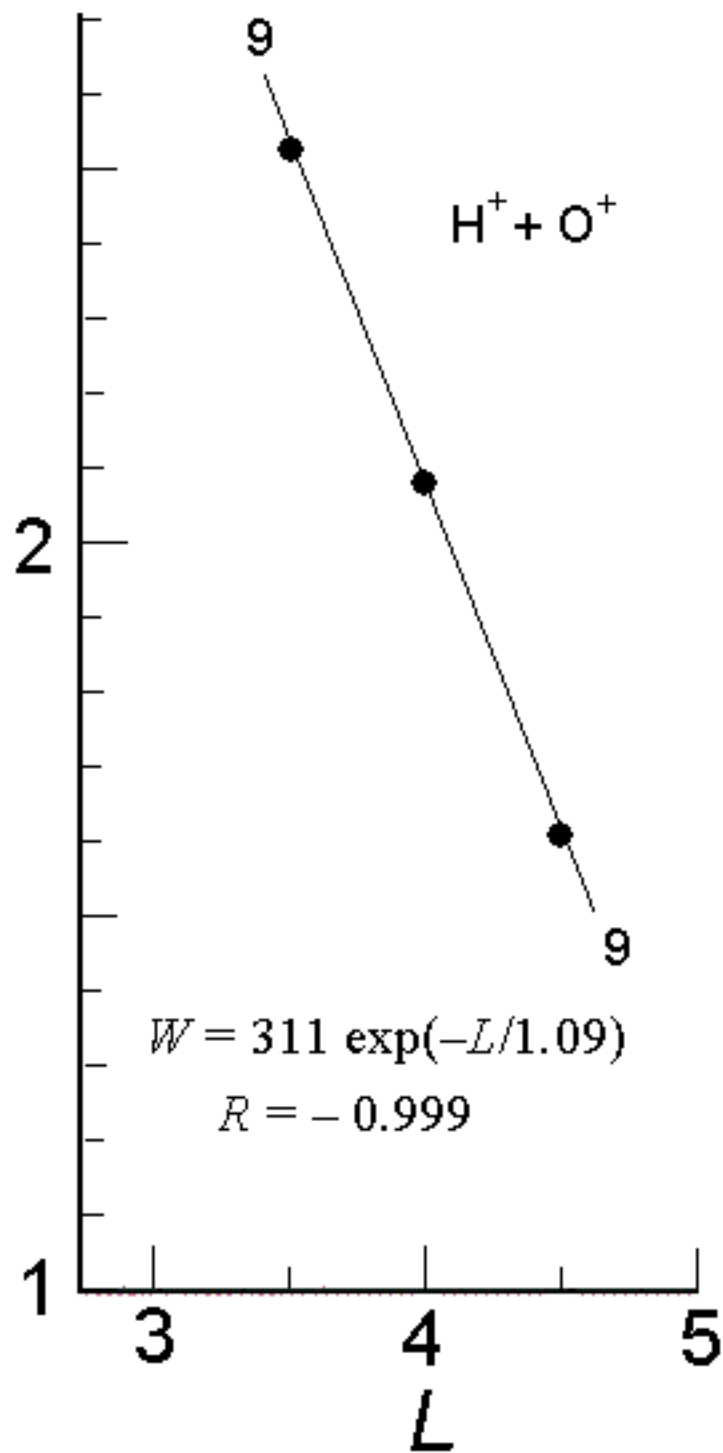



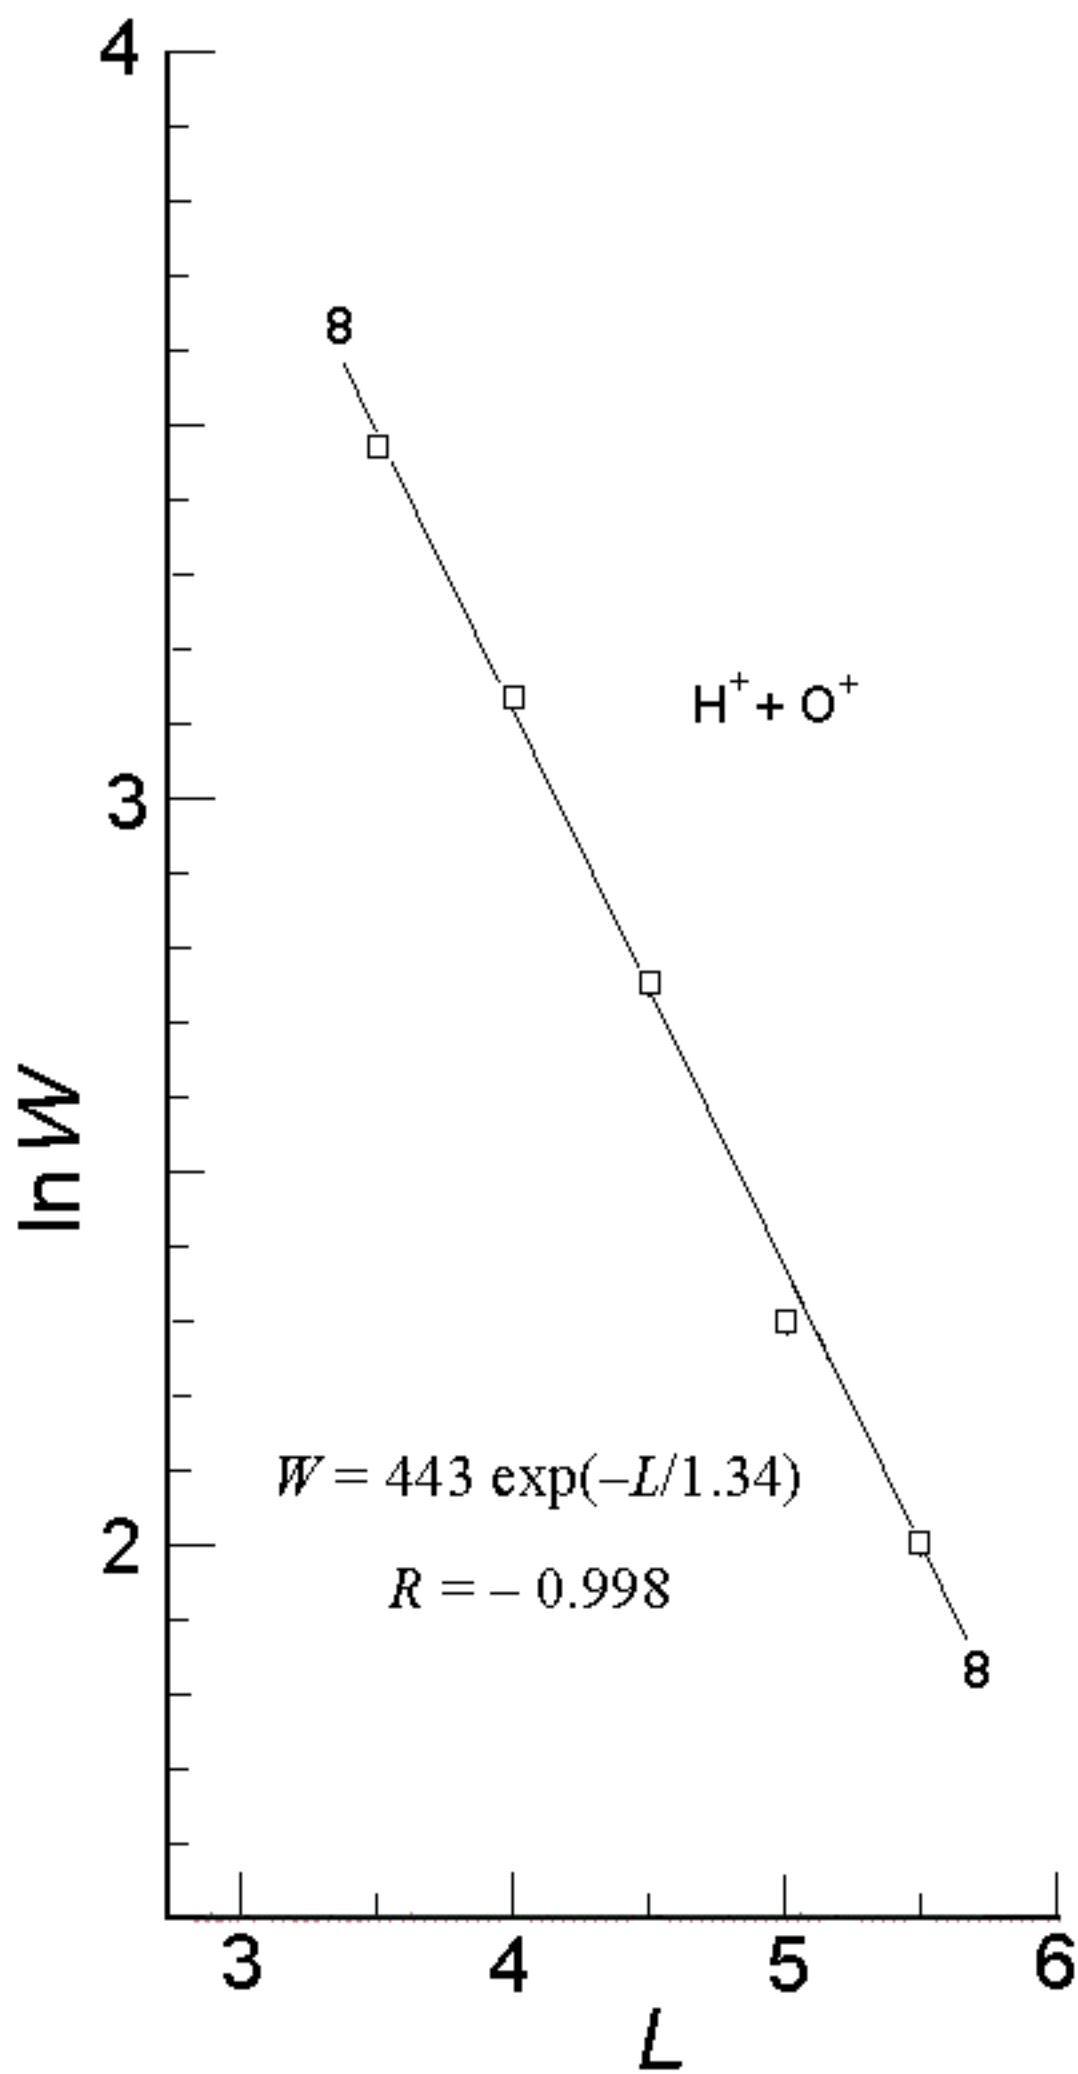

$\ln W$

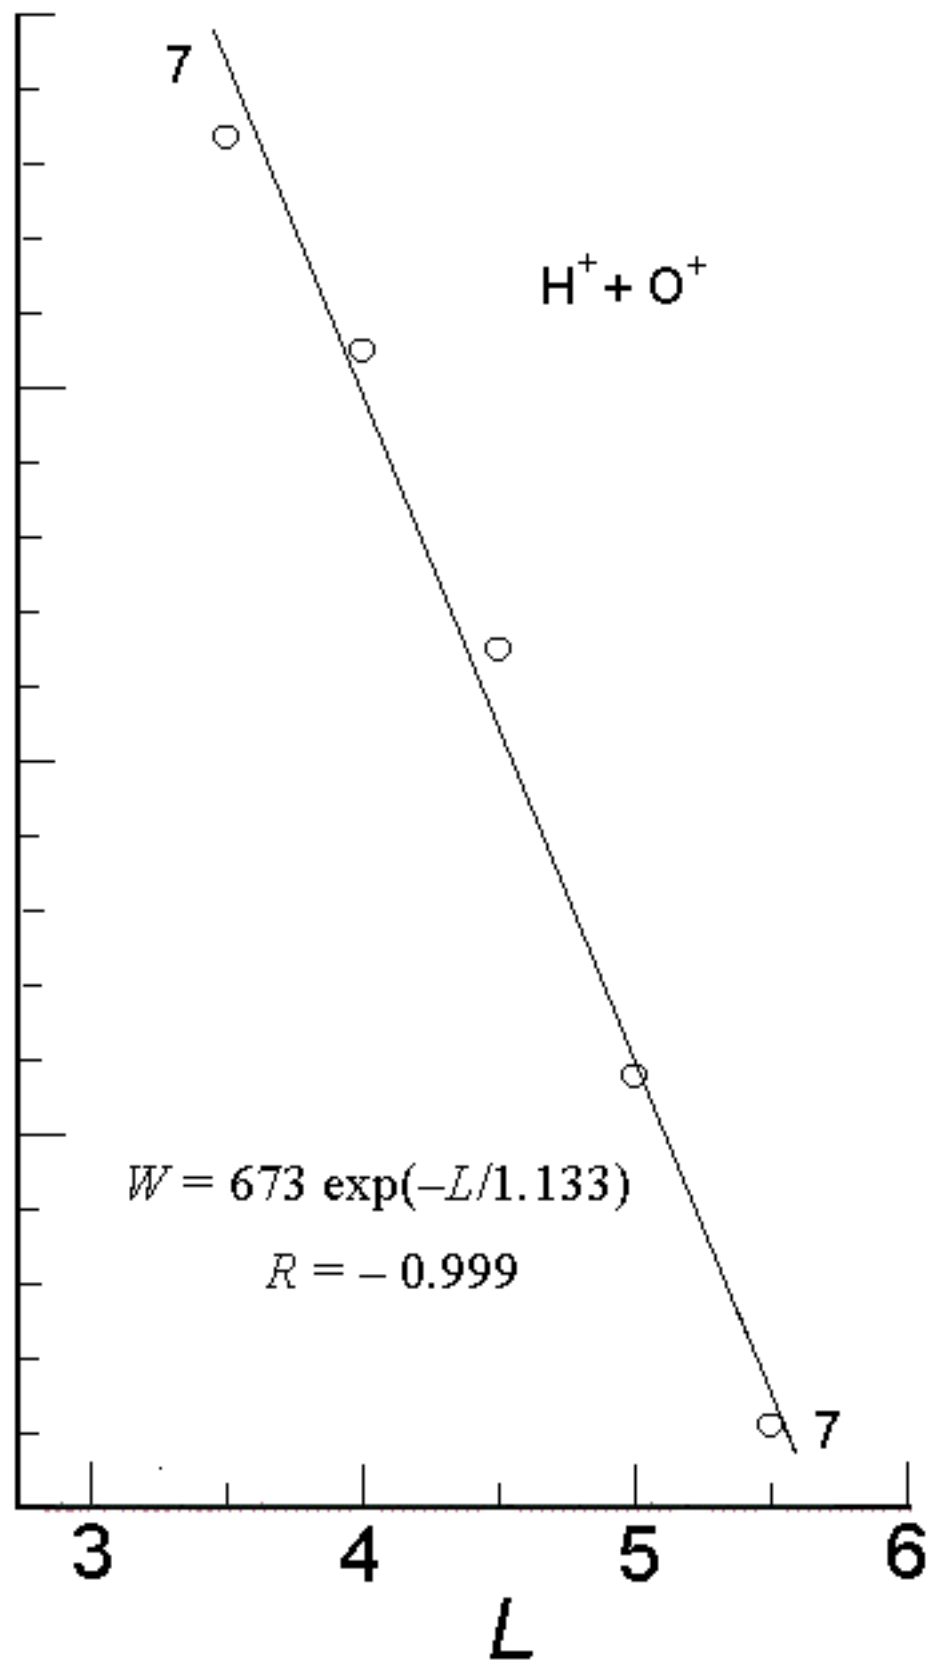

3

4

5

6

$L$

7

7

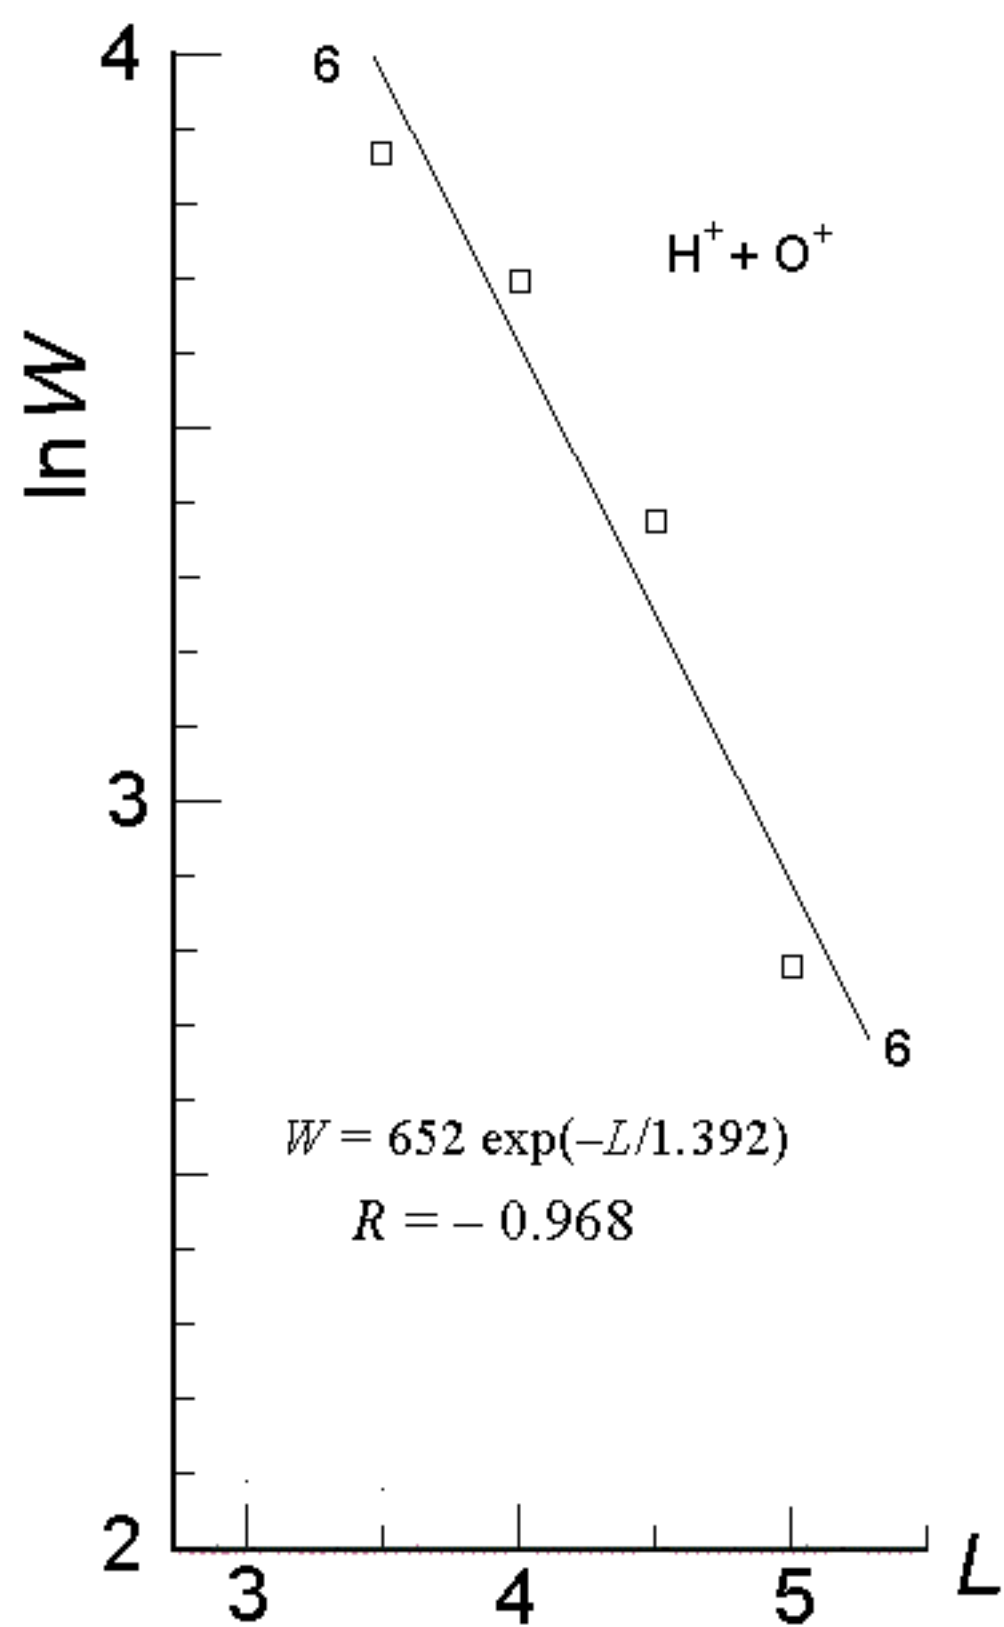

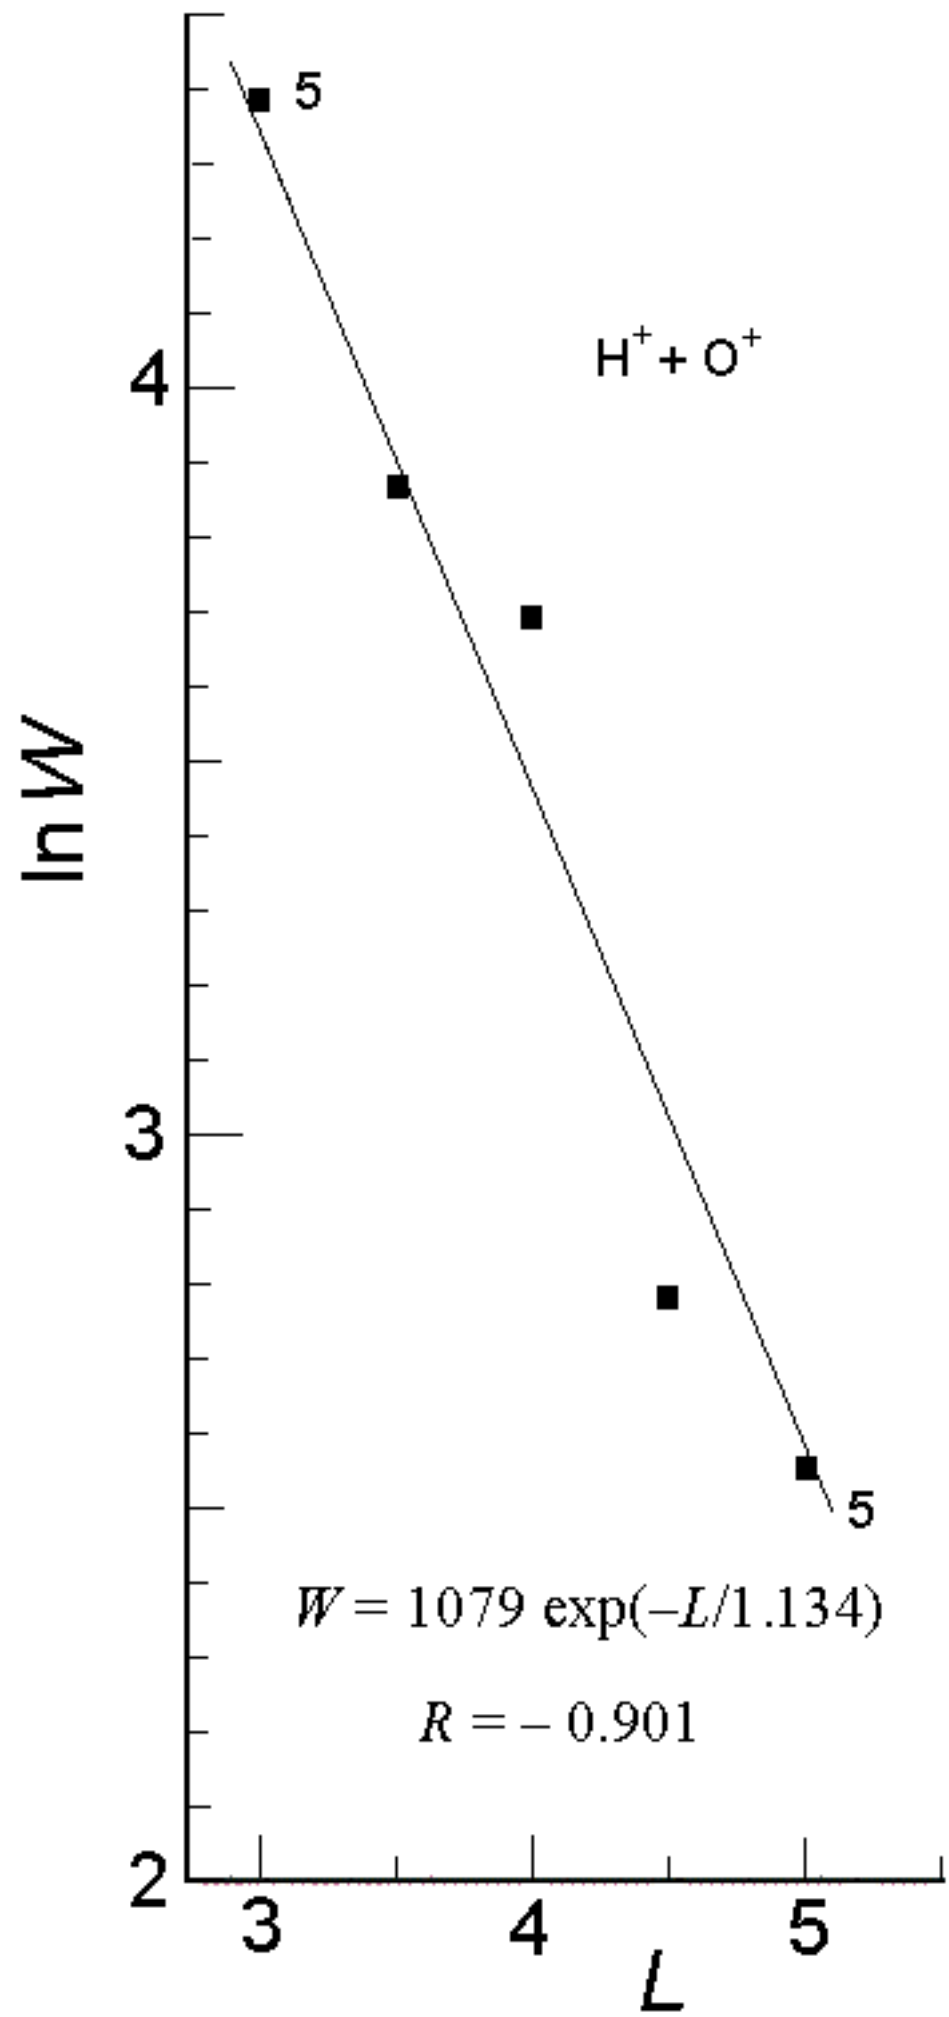

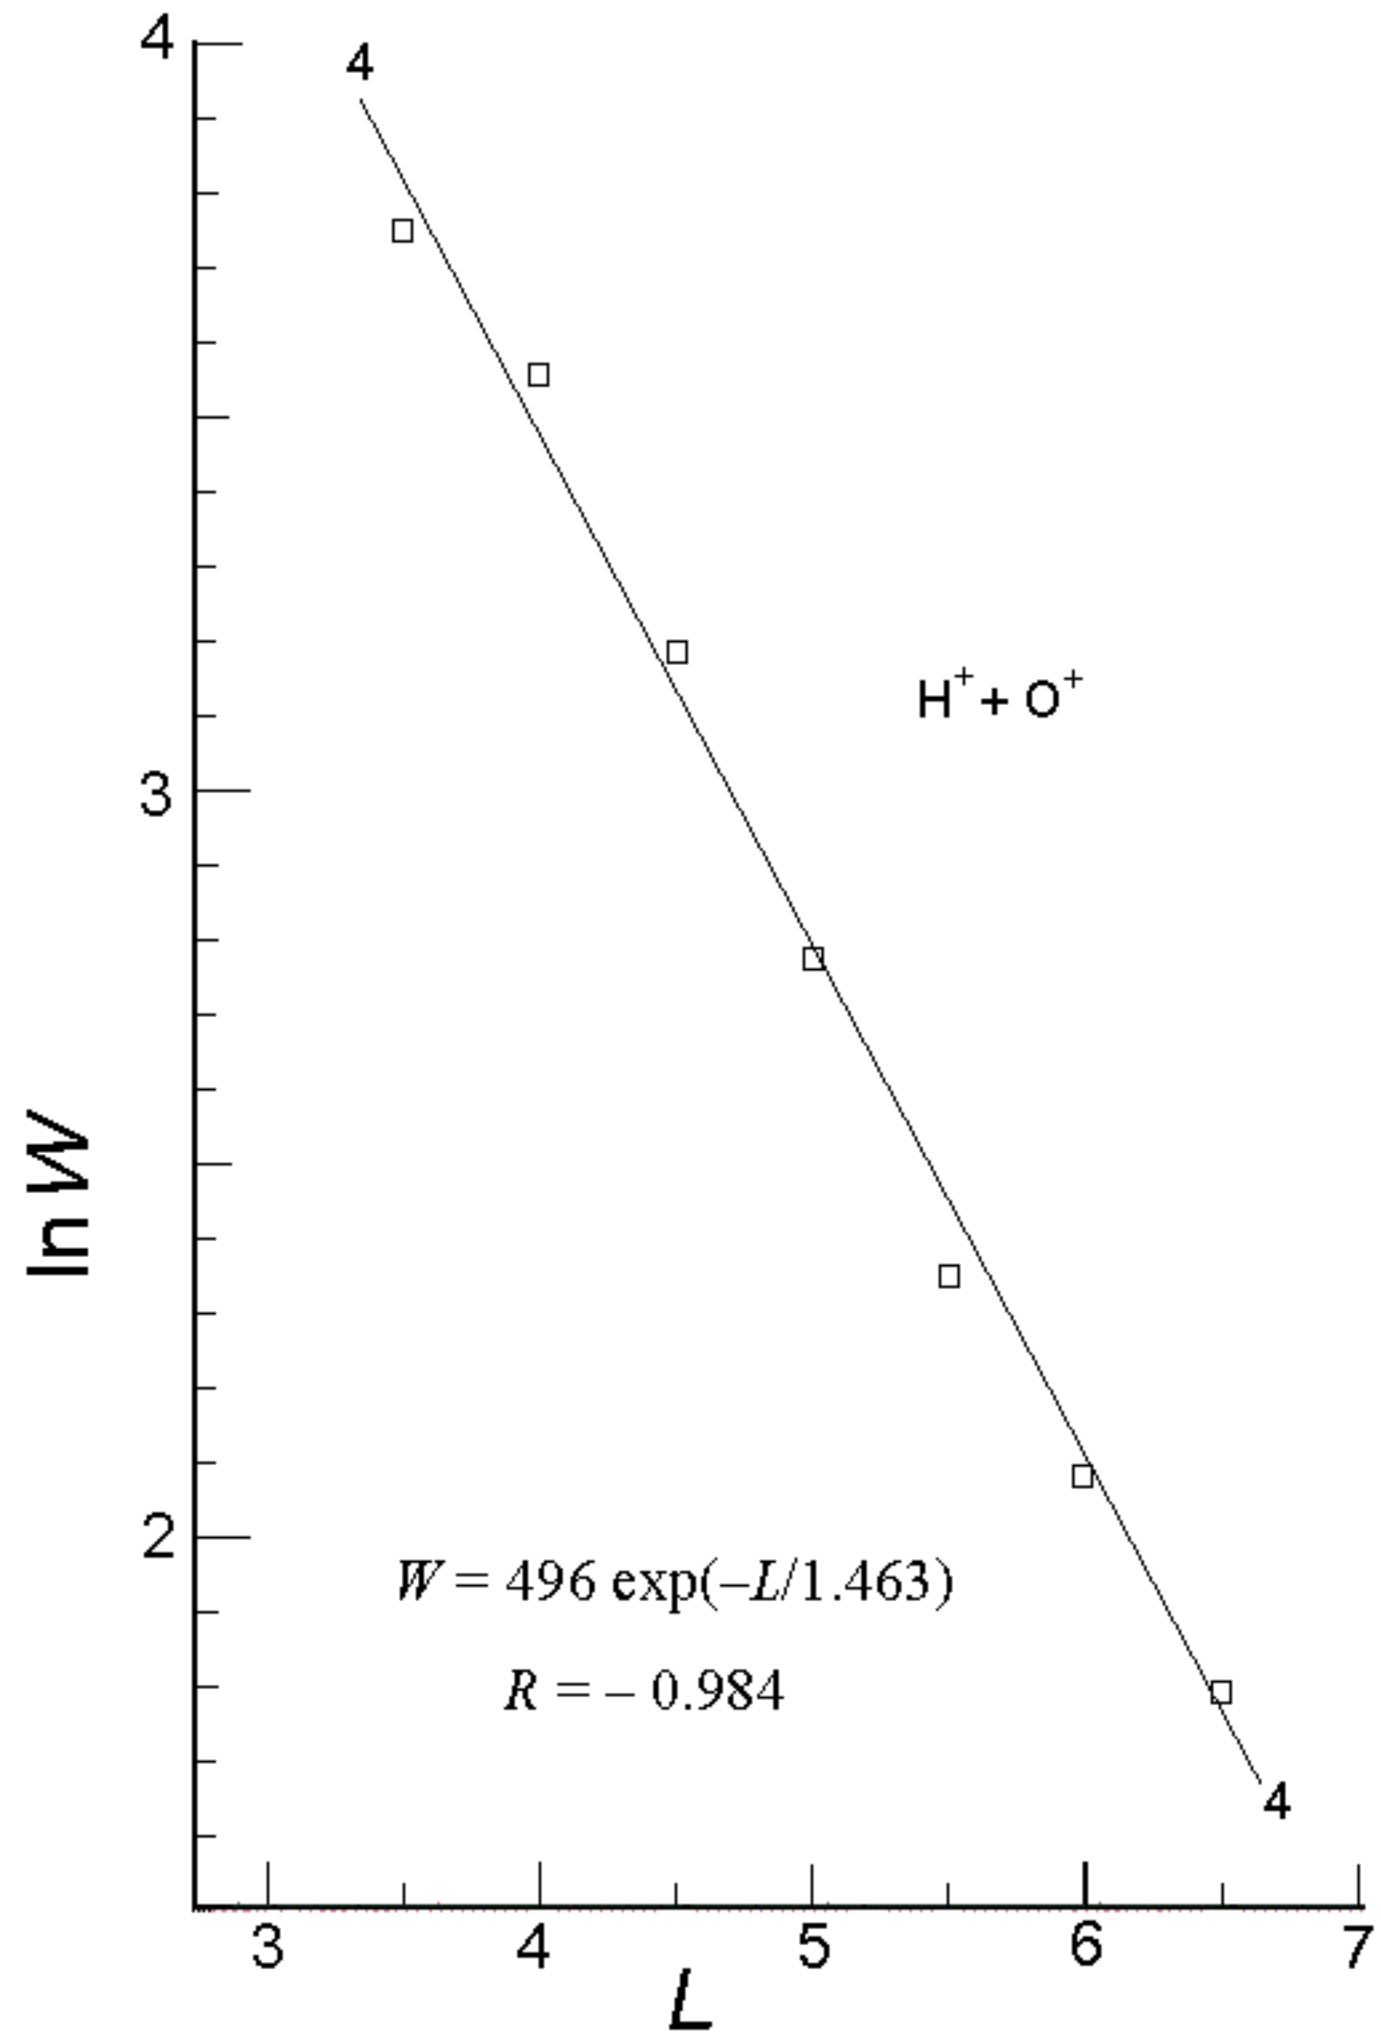

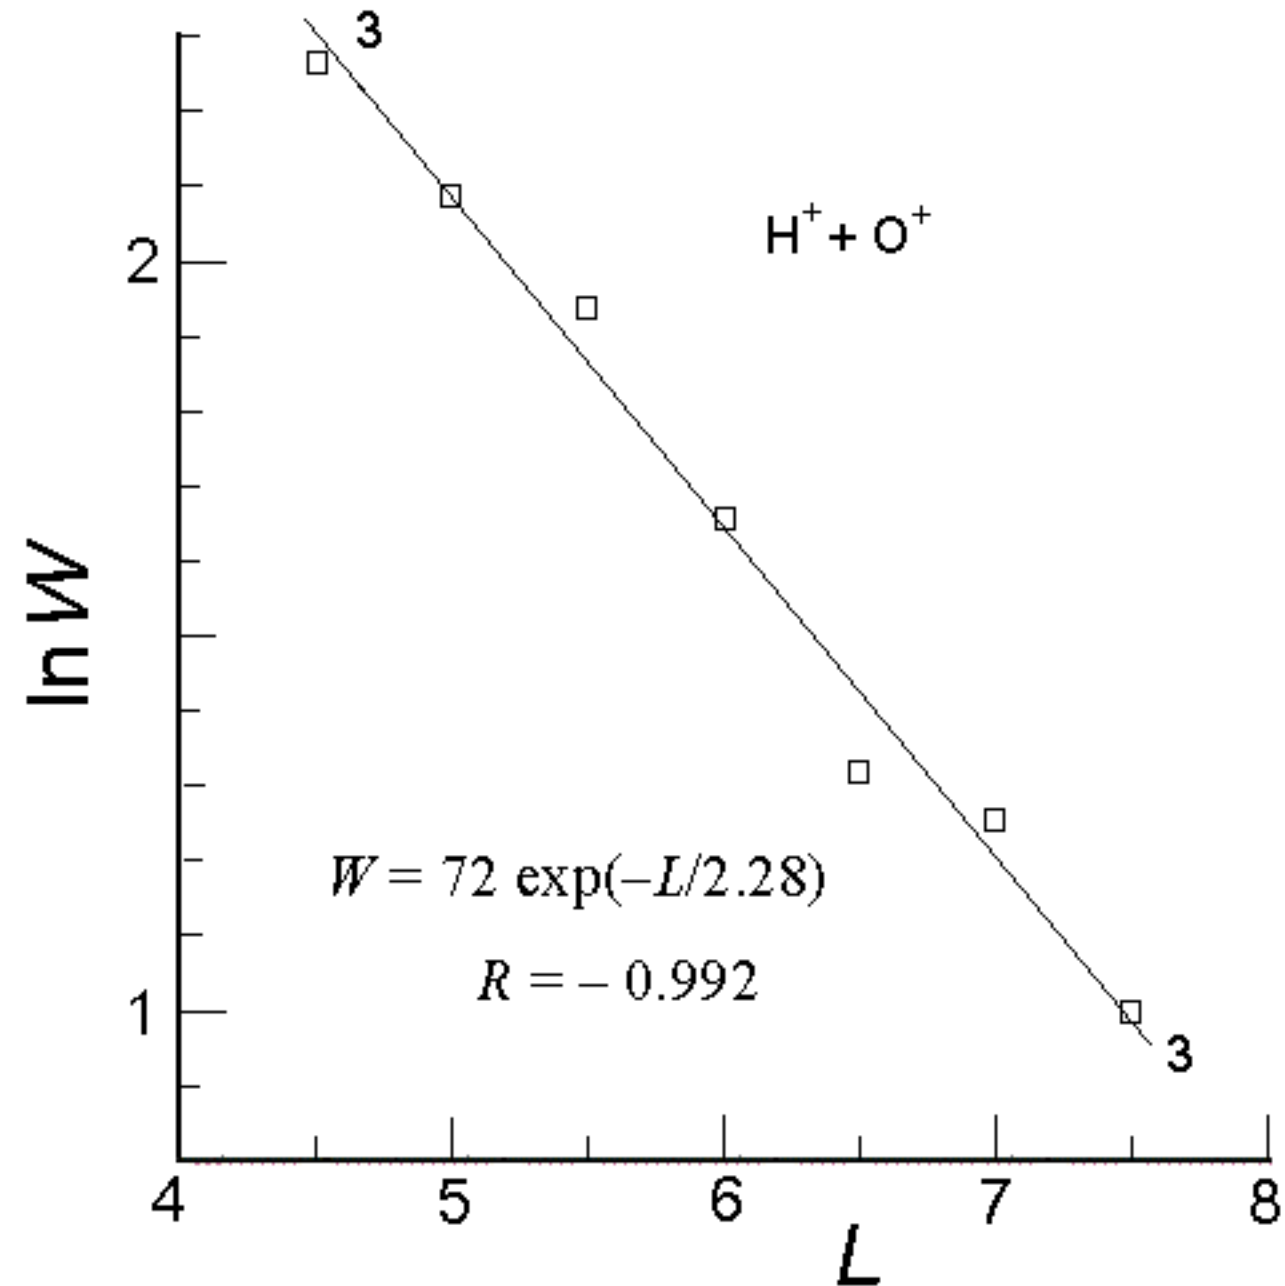

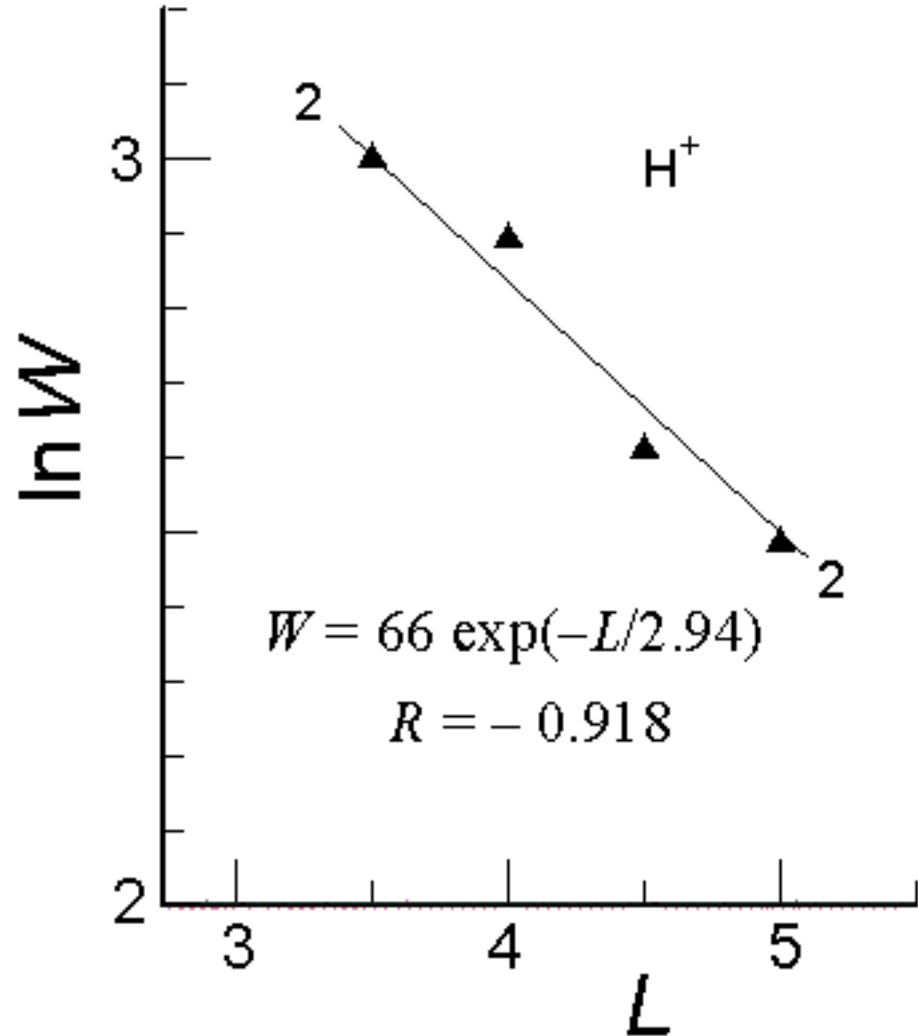

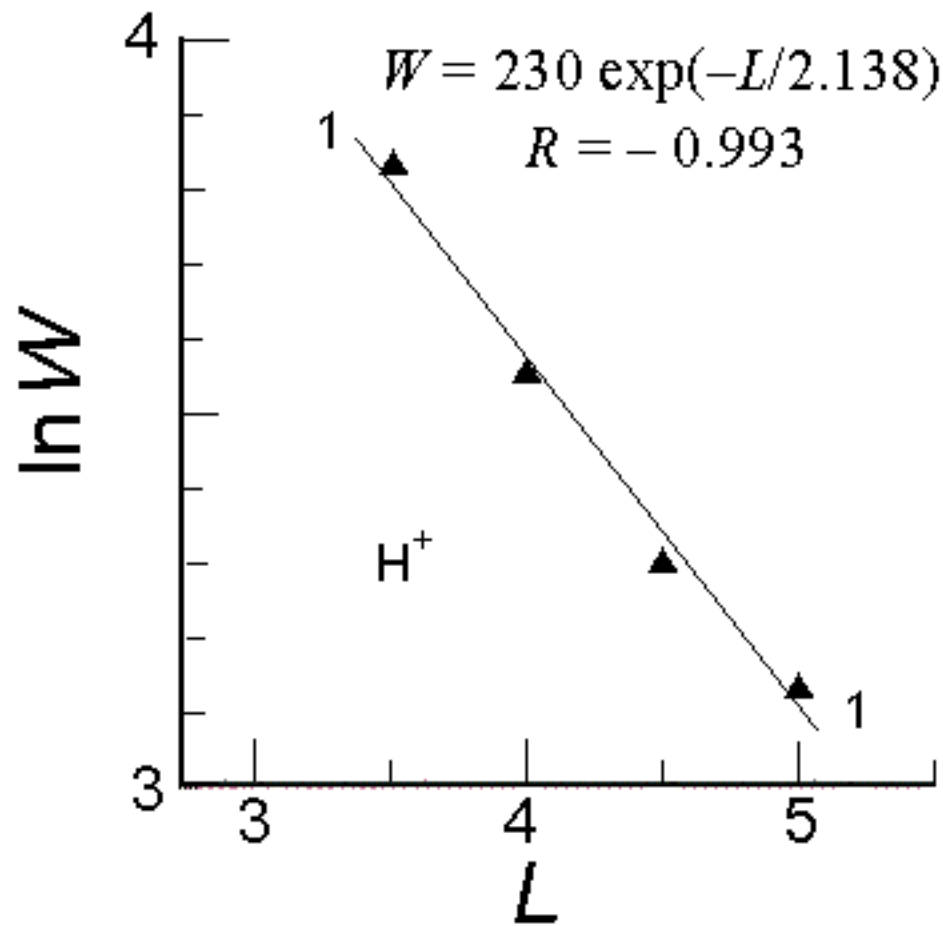

Supplement: Supplementary file [file angeo-2023-10-AC4-supplement.pdf]
