# Supplementary material for: Ion’s ring current: regularities of the energy density distributions on the main phase of geomagnetic storms
Source: Copernicus journal article supplement (doi:10.5194/angeo-2023-10), 2023-03-28
Supplement: Supplementary file [file angeo-2023-10-AC1-supplement.pdf]

***Reply to Interactive comment by Anonymous Referee #1 from 15 May 2023 on the manuscript “Ion’s ring current: regularities of the energy density distributions on the main phase of geomagnetic storms” by Alexander S. Kovtyukh***

Deeply respected Referee #1,

I am very grateful to you for such an exclusively thorough review. All these comments are very helpful for me and it is taken into account in the manuscript. The work is large, complex, but most of its intermediate results remain in my archive, and I understand and accept your doubts and concerns about the reliability of the final results presented here.

With grand regard,  
Alexander S. Kovtyukh

RC1: The paper presents a study of inner magnetospheric hot ion energy density during storms, searching for patterns as a function of radial distance and local time for different ion energy ranges. The values used are based on other published studies, greatly limiting the robustness of the data set considered. The methodology is flawed. The conclusions are not particular new or significant. I find that the study is not ready for publication.

AC: I have always believed that published data that is cross-checked and well understood is the most reliable. If there are errors there, they will definitely appear in other publications of experimental data (I have always made such a comparison according to the data of different experiments).

Initially, this work did not set the task of searching for some completely new, radically different from the already known regularities in the storm dynamics of the ionic ring current (RC). The main goal here was to compare the well-known experimental results for RC ions and obtain the most harmonious overall picture. And this is not such a simple task, given that all storms are different and the RC parameters depend on the state and prehistory of the magnetosphere and heliosphere, as well as on the energy and ionic composition of the RC.

However, there are two conclusions here, which were put forward as hypotheses in the works on mathematical modeling of the RC. These hypotheses receive here quantitative experimental confirmation.

1. The conclusion that for  $O^+$  ions with  $E \sim 1\text{--}300$  keV the parameter  $\beta_m \propto L_m^{-6}$  (Fig. 2c); this result shows that a deeper penetration of hot plasma into a geomagnetic trap during strong storms requires not only a stronger convection electric field, but also a significant preliminary accumulation and acceleration of ions (especially  $O^+$  ions) in the RC source.

2. For the first time, it was also shown from experimental data (Fig. 4) that the greater  $|D_{st}|$  at the end of the main phase of storms, the smaller the contribution of ions with  $E < 60$  keV and the greater the contribution of higher-energy ions to the RC energy density (the average ion energy increases).

In addition, all other conclusions receive quantitative confirmation and analytical expression.

RC1: The introduction has no references to prior work except in two place, one where 10 “reviews” are cited all at once and other where the author’s own prior work (from 2010) is cited. This method of citation is inadequate for justifying and motivating a new study. In fact, this new paper is very similar to their 2010 study, except with slightly different prior publications included.

AC: Hundreds of original experimental papers on the RC ions have been published over 50–60 years (including dozens of papers based on data from satellites of the Molniya, Horizont, and Kosmos series with the participation of the author, but these results are not suitable for solving the problems which are considered here, and I do not refer to them). Many hundreds of works on mathematical modeling of the RC have been performed also.

Since the problems considered here concerns almost all aspects of the RC dynamics, it is impossible to give a sufficiently complete list of these works here, and I limited myself only to the most complete reviews (not including my reviews on the RC in monographs published in Russia), and original works that are directly related to the set tasks here (they are given in the following text and in the References).

Kovtyukh (2010) was considered only the position of the RC energy density maximum and the parameter  $\beta_m$  at this maximum depending on the value of  $|D_{st}|$ , as well as the *shape* of the RC outer edge. In this work only the energy densities of protons and the total energy densities of all RC ions were considered; separate analysis for protons and oxygen ions, as well as for ion energy and MLT was not carried out; the dependences of the parameters of the outer edge of the RC on  $|D_{st}|$  and MLT were not considered. In 2010, there was also no data from the Van Allen Probes satellites, which play a very important role here.

It would be possible to bring the Introduction to the normal generally accepted form if I knew other articles with such a statement of the problem. And I very carefully read all publications on RC ions, especially experimental ones, over the past 50 years.

RC1: It only uses 11 storm events, some with repeated entries, to increase the number of entries in Table 1 up to 17. I don’t understand the selection of events and timings for this table, nor the focus on these events. This is not a systematic study of hot ion energy content, but a highly skewed listing based on the author’s selection of previously published studies. There is no way to verify the robustness of the results.

AC: The classification and selection of the experimental data considered here are described in detail in Section 2.

In Table. 1, as in other tables, there are no duplicate entries; they all refer to different UT, and if they are at close UT, then they are obtained by different instruments (this applies only to data from the Van Allen Probes satellites).

The choice of experimental results, events, and time is not accidental here and covers almost all results on the radial energy density profiles of  $H^+$  and  $O^+$  RC ions near the equatorial plane, published from 1973 to 2022 (not counting repeated publications).

Many other publications on RC ions can be added to this, but they were obtained in regions that deviate significantly from the equatorial plane (on the OGO-3, Molniya-1, Polar satellites, etc.), as well as on low-altitude polar satellites. Geostationary orbit is also not suitable for our purposes.

In addition, in the last 10-20 years, most of results on the RC are presented only in the form of color spectrograms of ion fluxes. Such spectrograms well illustrate the evolution of the fluxes and spectra of ions in the satellite orbit, but from them it is impossible to extract sufficiently accurate flux values (and to determine the shape of the spectra), which is necessary for calculating the ion energy density and constructing the radial profiles of the RC.

To check the reliability of the results presented here, it is enough to open the corresponding article indicated in the last column of Table. 1.

RC1: Conducting line fits with fewer than 10 points makes the resulting fit highly susceptible to outliers. It also takes a very high R to reach the traditional  $p=0.05$  level of statistical significance. For example, neither of the R values listed on page 5 (end of section 3.1) reach this p value. That is, even with these seemingly high correlation coefficients, the fit has a decent probability of arising from random chance. In any case, a linear fit of 3 points (the second equation) is almost never a reasonable scientific method.

AC: I agree. Text will be corrected.

RC1: I have a side comment on visualization in this paper. I greatly dislike the inclusion of points that are then not used in the fits (Figures 1, 2, 5, and 6), or the inclusion of two line fits from subsets of the points on the same graph (Figure 4). This obscures the true connection between points and linear fits. It is fine to show them all together, but then also make a separate plot to show what points go with what fit.

AC: Figure 1 shows all 17 points corresponding to the Table 1.

The physical reasons why from Figs. 2, 4, 5, and 6, the certain experimental points are excluded or not taken into account in the calculations of correlation dependencies, in each case (for each figure) are specified in the text of the article.

The lines in Fig. 4 very clearly show mutually opposite tendencies in these dependences for ions of high and low energies, and it is undesirable to separate them.

RC1: For Table 2, the peak energy density column has values given to one or two significant figures. The beta values are then given to 3 significant figures, which is unjustified. They should all be reported only to one significant digit. The uncertainty on all of the beta values is, therefore, large. This most liinvalidates the linear fits found from

the plots of beta versus 3 parameters in Figure 2. While the R values of the two fits reach the  $p=0.05$  level, this extra uncertainty makes them not meaningful.

AC: I agree. Table 2 (lines 3, 6, 9, 14, 15) and Fig. 2 are corrected.

But these changes do not exceed a few percent, and practically they do not affect the correlation curves in Fig. 2.

RC1: The analysis at the beginning of section 3.3, built around Table 3 and Figure 3, appear to be based on exponential curve parameter values from only two L value energy densities. This chosen functional form is not justified with only two points. This analysis does not defend the “well described” word choice in the text.

AC: Considering Fig. 3, one can indeed assume that the curves shown on it are built along two extreme points, but the text of the article explains how this figure was built. In Appendix 1, these curves are given along with the experimental points (these figures take up too much space and therefore were excluded from the article and replaced by the general Fig. 3).

RC1: I have the same complaints about Figures 4, 5, and 6 as I do about Figures 1 and 2. There are too few points, chosen by an unsystematic selection of storm events, to make the results meaningful.

AC: The choice of the experimental points is by no an unsystematic (see above).

RC1: I think that the issues with the methodology of section 3 invalidate any conclusions drawn from the discussion in section 4.

AC: I hope that the discussion held here removes this objection.

RC1: The conclusions drawn are not new. That the ions should move closer to the Earth during larger storm events is well known. A maximum energy density in the pre-midnight sector is expected based on drift physics. The same can be said about the energy dependence of MLT features.

AC: It has long been known that with increasing geomagnetic activity, the RC approaches the Earth. But how strong is this dependence?

Many specific questions also arise regarding the asymmetry of the RC, although in general it is understandable and has long been known.

These and other questions on the RC require further comprehensive analysis. Different mathematical models give different answers to these and many other questions for the RC.

In this work, two new conclusions were obtained, which were previously put forward as imprecise hypotheses, and here they receive experimental confirmation and a quantitative expression (see above).

RC1: The only suggestion that I can make to raise the robustness: download the data for many more storms and calculate these dependences with a systematic approach to all possible observations. Instead of relying on other studies to identify storms and do the initial analysis, calculate the energy densities directly from the data.

AC: Unfortunately, the problems considered here cannot be solved in such a simple way. The problem of the RC is very complex, and by purely statistical studies (they are also very important), it can hardly be solved completely.

It would be possible to take as a basis the experimental data on the ion fluxes of the RC, presented in the Internet, and carry out a more complete statistical analysis of the parameters of the RC for several dozen storms, but sufficiently complete data on the RC suitable for the problems considered here are not available in the Internet (they are not freely available).

In addition, such data may contain large methodological errors associated with the transmission of information, with noise and illumination of devices, background fluxes, and problems of ion selection by charge and mass.

Kind regards,  
Alexander Kovtyukh
