# Supplementary material for: Ion’s ring current: regularities of the energy density distributions on the main phase of geomagnetic storms
Source: Copernicus journal article supplement (doi:10.5194/angeo-2023-10), 2023-03-28
Supplement: Supplementary file [file angeo-2023-10-AC3-supplement.pdf]

|                   | $L$  | $\Delta L$ | $(\Delta L)^2$ | $\Delta x \Delta y$ | $W$ | $\ln W$ | $\Delta \ln W$ | $(\Delta \ln W)^2$ |
|-------------------|------|------------|----------------|---------------------|-----|---------|----------------|--------------------|
|                   | 3.5  | -0.75      | 0.5625         | -0.2811             | 46  | 3.8286  | 0.3748         | 0.1405             |
|                   | 4    | -0.25      | 0.0625         | -0.0254             | 35  | 3.5553  | 0.1015         | 0.0103             |
|                   | 4.5  | 0.25       | 0.0625         | -0.0395             | 27  | 3.2958  | -0.1580        | 0.0250             |
|                   | 5    | .75        | 0.5625         | -0.2387             | 23  | 3.1355  | -0.3183        | 0.1013             |
| $\Sigma$          | 17   | 0          | 1.25           | -0.5847             |     | 13.8152 | 0              | 0.2771             |
| $\langle \rangle$ | 4.25 | 0          | 0.3125         | -0.1462             |     | 3.4538  | 0              | 0.0693             |
| $s_x^2$           |      |            | 0.4167         |                     |     |         |                |                    |
| $s_x$             |      |            | 0.6455         |                     |     |         |                |                    |
| $s_y^2$           |      |            |                |                     |     |         |                | 0.09237            |
| $s_y$             |      |            |                |                     |     |         |                | 0.30392            |
| $s_{xy}$          |      |            |                | -0.1949             |     |         |                |                    |

$$R = -0.993$$

$$W = W_0 e^{-L/L_0}$$

$$\ln W = \ln W_0 - L/L_0 = 5.4416 - L/2.138$$

$$W = 230 \exp(-L/2.138)$$

|                   | $L$  | $\Delta L$ | $(\Delta L)^2$ | $\Delta x \Delta y$ | $W$  | $\ln W$ | $\Delta \ln W$ | $(\Delta \ln W)^2$ |
|-------------------|------|------------|----------------|---------------------|------|---------|----------------|--------------------|
|                   | 3.5  | -0.75      | 0.5625         | -0.1894             | 20   | 2.996   | 0.2525         | 0.0638             |
|                   | 4    | -0.25      | 0.0625         | -0.0069             | 18   | 2.890   | 0.1465         | 0.0215             |
|                   | 4.5  | 0.25       | 0.0625         | -0.0351             | 13.5 | 2.603   | -0.1405        | 0.0197             |
|                   | 5    | .75        | 0.5625         | -0.1939             | 12   | 2.485   | -0.2585        | 0.0668             |
| $\Sigma$          | 17   | 0          | 1.25           | -0.4253             |      | 10.974  | 0              | 0.1718             |
| $\langle \rangle$ | 4.25 | 0          | 0.3125         | -0.1063             |      | 2.7435  | 0              | 0.043              |
| $s_x^2$           |      |            | 0.4167         |                     |      |         |                |                    |
| $s_x$             |      |            | 0.6455         |                     |      |         |                |                    |
| $s_y^2$           |      |            |                |                     |      |         |                | 0.05727            |
| $s_y$             |      |            |                |                     |      |         |                | 0.2393             |
| $s_{xy}$          |      |            |                | -0.1418             |      |         |                |                    |

$$R = -0.918$$

$$W = W_0 e^{-L/L_0}$$

$$\ln W = \ln W_0 - L/L_0 = 4.19 - L/2.938$$

$$W = 66 \exp(-L/2.94)$$

|                   | $L$ | $\Delta L$ | $(\Delta L)^2$ | $\Delta x \Delta y$ | $W$ | $\ln W$ | $\Delta \ln W$ | $(\Delta \ln W)^2$ |
|-------------------|-----|------------|----------------|---------------------|-----|---------|----------------|--------------------|
|                   | 4.5 | -1.5       | 2.25           | -0.9440             | 9.7 | 2.272   | 0.6293         | 0.3960             |
|                   | 5   | -1         | 1              | -0.4493             | 8.1 | 2.092   | 0.4493         | 0.2019             |
|                   | 5.5 | -0.5       | 0.25           | -0.1447             | 6.9 | 1.932   | 0.2893         | 0.0837             |
|                   | 6   | 0          | 0              | 0                   | 5.2 | 1.649   | 0.0063         | 0.0000             |
|                   | 6.5 | 0.5        | 0.25           | -0.1674             | 3.7 | 1.308   | -0.3347        | 0.1120             |
|                   | 7   | 1          | 1              | -0.3897             | 3.5 | 1.253   | -0.3897        | 0.1519             |
|                   | 7.5 | 1.5        | 2.25           | -0.9746             | 2.7 | 0.993   | -0.6497        | 0.4221             |
| $\Sigma$          | 42  | 0          | 7              | -3.0697             |     | 11.499  | 0.0001         | 1.3676             |
| $\langle \rangle$ | 6   | 0          | 1              | -0.4385             |     | 1.6427  | 0              | 0.1954             |
| $s_x^2$           |     |            | 1.1667         |                     |     |         |                |                    |
| $s_x$             |     |            | 1.0801         |                     |     |         |                |                    |
| $s_y^2$           |     |            |                |                     |     |         |                | 0.2279             |
| $s_y$             |     |            |                |                     |     |         |                | 0.4774             |
| $s_{xy}$          |     |            |                | -0.5116             |     |         |                |                    |

$$R = -0.992$$

$$W = W_0 e^{-L/L_0}$$

$$\ln W = \ln W_0 - L/L_0 = 4.2737 - L/2.28$$

$$W = 72 \exp(-L/2.28)$$

|                   | $L$ | $\Delta L$ | $(\Delta L)^2$ | $\Delta x \Delta y$ | $W$ | $\ln W$ | $\Delta \ln W$ | $(\Delta \ln W)^2$ |
|-------------------|-----|------------|----------------|---------------------|-----|---------|----------------|--------------------|
|                   | 3.5 | -1.5       | 2.25           | -1.425              | 42  | 3.738   | 0.95           | 0.9025             |
|                   | 4   | -1         | 1              | -0.767              | 35  | 3.555   | 0.767          | 0.5883             |
|                   | 4.5 | -0.5       | 0.25           | -0.195              | 24  | 3.178   | 0.39           | 0.1521             |
|                   | 5   | 0          | 0              | 0                   | 16  | 2.773   | -0.015         | 0.0002             |
|                   | 5.5 | 0.5        | 0.25           | -0.195              | 11  | 2.398   | -0.39          | 0.1521             |
|                   | 6   | 1          | 1              | -0.709              | 8   | 2.079   | -0.709         | 0.5927             |
|                   | 6.5 | 1.5        | 2.25           | -1.494              | 6   | 1.792   | -0.996         | 0.9920             |
| $\Sigma$          | 35  | 0          | 7              | -4.785              |     | 19.513  | -0.003         | 3.3799             |
| $\langle \rangle$ | 5   | 0          | 1              | -0.6836             |     | 2.788   | 0              | 0.4828             |
| $s_x^2$           |     |            | 1.167          |                     |     |         |                |                    |
| $s_x$             |     |            | 1.0801         |                     |     |         |                |                    |
| $s_y^2$           |     |            |                |                     |     |         |                | 0.5633             |
| $s_y$             |     |            |                |                     |     |         |                | 0.7505             |
| $s_{xy}$          |     |            |                | -0.7975             |     |         |                |                    |

$$R = -0.984$$

$$W = W_0 e^{-L/L_0}$$

$$\ln W = \ln W_0 - L/L_0 = 6.2061 - L/1.463$$

$$W = 496 \exp(-L/1.463)$$

|                   | $L$ | $\Delta L$ | $(\Delta L)^2$ | $\Delta x \Delta y$ | $W$  | $\ln W$ | $\Delta \ln W$ | $(\Delta \ln W)^2$ |
|-------------------|-----|------------|----------------|---------------------|------|---------|----------------|--------------------|
|                   | 3   | -1         | 1              | -0.925              | 80   | 4.382   | 0.925          | 0.856              |
|                   | 3.5 | -0.5       | 0.25           | -0.210              | 48.3 | 3.877   | 0.420          | 0.176              |
|                   | 4   | 0          | 0              | 0                   | 40   | 3.695   | 0.238          | 0.057              |
|                   | 4.5 | 0.5        | 0.25           | -0.171              | 16   | 2.773   | -0.684         | 0.468              |
|                   | 5   | 1          | 1              | -0.901              | 13   | 2.556   | -0.901         | 0.812              |
| $\Sigma$          | 20  | 0          | 2.5            | -2.207              |      | 17.283  | -0.002         | 2.399              |
| $\langle \rangle$ | 4   | 0          | 0.5            | -0.441              |      | 3.457   | 0              | 0.480              |
| $s_x^2$           |     |            | 0.625          |                     |      |         |                |                    |
| $s_x$             |     |            | 0.791          |                     |      |         |                |                    |
| $s_y^2$           |     |            |                |                     |      |         |                | 0.600              |
| $s_y$             |     |            |                |                     |      |         |                | 0.774              |
| $s_{xy}$          |     |            |                | -0.552              |      |         |                |                    |

$$R = -0.901$$

$$W = W_0 e^{-L/L_0}$$

$$\ln W = \ln W_0 - L/L_0 = 6.984 - L/1.134$$

$$W = 1079 \exp(-L/1.134)$$

|                   | $L$  | $\Delta L$ | $(\Delta L)^2$ | $\Delta x \Delta y$ | $W$   | $\ln W$ | $\Delta \ln W$ | $(\Delta \ln W)^2$ |
|-------------------|------|------------|----------------|---------------------|-------|---------|----------------|--------------------|
|                   | 3.5  | -0.75      | 0.5625         | -0.330              | 47.8  | 3.867   | 0.440          | 0.1936             |
|                   | 4    | -0.25      | 0.0625         | -0.067              | 40.25 | 3.695   | 0.268          | 0.0718             |
|                   | 4.5  | 0.25       | 0.0625         | -0.015              | 29    | 3.367   | -0.060         | 0.0036             |
|                   | 5    | 0.75       | 0.5625         | -0.486              | 16.1  | 2.779   | -0.648         | 0.4199             |
| $\Sigma$          | 17   | 0          | 1.25           | -0.898              |       | 13.708  | 0              | 0.6889             |
| $\langle \rangle$ | 4.25 | 0          | 0.3125         | -0.2245             |       | 3.427   | 0              | 0.1722             |
| $s_x^2$           |      |            | 0.4167         |                     |       |         |                |                    |
| $s_x$             |      |            | 0.6455         |                     |       |         |                |                    |
| $s_y^2$           |      |            |                |                     |       |         |                | 0.2296             |
| $s_y$             |      |            |                |                     |       |         |                | 0.4792             |
| $s_{xy}$          |      |            |                | -0.2993             |       |         |                |                    |

$$R = -0.968$$

$$W = W_0 e^{-L/L_0}$$

$$\ln W = \ln W_0 - L/L_0 = 6.47996 - L/1.3921$$

$$W = 652 \exp(-L/1.392)$$

| 10                | $L$  | $\Delta L$ | $(\Delta L)^2$ | $\Delta x \Delta y$ | $W$ | $\ln W$ | $\Delta \ln W$ | $(\Delta \ln W)^2$ |
|-------------------|------|------------|----------------|---------------------|-----|---------|----------------|--------------------|
|                   | 3.5  | -1         | 1              | -0.791              | 28  | 3.332   | 0.791          | 0.626              |
|                   | 4    | -0.5       | 0.25           | -0.252              | 21  | 3.045   | 0.504          | 0.254              |
|                   | 4.5  | 0          | 0              | 0                   | 14  | 2.639   | 0.098          | 0.010              |
|                   | 5    | 0.5        | 0.25           | -0.231              | 8   | 2.079   | -0.462         | 0.213              |
|                   | 5.5  | 1          | 1              | -0.932              | 5   | 1.609   | -0.932         | 0.869              |
| $\Sigma$          | 22.5 | 0          | 2.5            | -2.206              |     | 12.704  | -0.001         | 1.972              |
| $\langle \rangle$ | 4.5  | 0          | 0.5            | 0.441               |     | 2.541   | 0              | 0.394              |
| $s_x^2$           |      |            | 0.625          |                     |     |         |                |                    |
| $s_x$             |      |            | 0.791          |                     |     |         |                |                    |
| $s_y^2$           |      |            |                |                     |     |         |                | 0.493              |
| $s_y$             |      |            |                |                     |     |         |                | 0.702              |
| $s_{xy}$          |      |            |                | -0.5515             |     |         |                |                    |

$$R = -0.999$$

$$W = W_0 e^{-L/L_0}$$

$$\ln W = \ln W_0 - L/L_0 = 6.512 - L/1.133$$

$$W = 673 \exp(-L/1.133)$$

| 10                | $L$  | $\Delta L$ | $(\Delta L)^2$ | $\Delta x \Delta y$ | $W$  | $\ln W$ | $\Delta \ln W$ | $(\Delta \ln W)^2$ |
|-------------------|------|------------|----------------|---------------------|------|---------|----------------|--------------------|
|                   | 3.5  | -1         | 1              | -0.734              | 32   | 3.466   | 0.734          | 0.539              |
|                   | 4    | -0.5       | 0.25           | -0.2015             | 23   | 3.135   | 0.403          | 0.162              |
|                   | 4.5  | 0          | 0              | 0                   | 15.5 | 2.741   | 0.009          | 0.0001             |
|                   | 5    | 0.5        | 0.25           | -0.2145             | 10   | 2.303   | -0.429         | 0.184              |
|                   | 5.5  | 1          | 1              | -0.717              | 7.5  | 2.015   | -0.717         | 0.514              |
| $\Sigma$          | 22.5 | 0          | 2.5            | -1.867              |      | 13.66   | 0.000          | 1.399              |
| $\langle \rangle$ | 4.5  | 0          | 0.5            | -0.3734             |      | 2.732   | 0.000          | 0.28               |
| $s_x^2$           |      |            | 0.625          |                     |      |         |                |                    |
| $s_x$             |      |            | 0.791          |                     |      |         |                |                    |
| $s_y^2$           |      |            |                |                     |      |         |                | 0.35               |
| $s_y$             |      |            |                |                     |      |         |                | 0.5914             |
| $s_{xy}$          |      |            |                | -0.467              |      |         |                |                    |

$$R = -0.998$$

$$W = W_0 e^{-L/L_0}$$

$$\ln W = \ln W_0 - L/L_0 = 6.0944 - L/1.34$$

$$W = 443 \exp(-L/1.34)$$

| 10                | $L$ | $\Delta L$ | $(\Delta L)^2$ | $\Delta x \Delta y$ | $W$  | $\ln W$ | $\Delta \ln W$ | $(\Delta \ln W)^2$ |
|-------------------|-----|------------|----------------|---------------------|------|---------|----------------|--------------------|
|                   | 3.5 | -0.5       | 0.25           | -0.2275             | 12.5 | 2.526   | 0.455          | 0.2070             |
|                   | 4   | 0          | 0              | 0                   | 8    | 2.079   | 0.008          | 0.0000             |
|                   | 4.5 | 0.5        | 0.25           | -0.231              | 5    | 1.609   | -0.462         | 0.2134             |
| $\Sigma$          | 12  | 0          | 0.5            | -0.4585             |      | 6.214   | 0.001          | 0.4204             |
| $\langle \rangle$ | 4   | 0          | 0.167          | -0.1528             |      | 2.071   | 0              | 0.1401             |
| $s_x^2$           |     |            | 0.25           |                     |      |         |                |                    |
| $s_x$             |     |            | 0.5            |                     |      |         |                |                    |
| $s_y^2$           |     |            |                |                     |      |         |                | 0.2102             |
| $s_y$             |     |            |                |                     |      |         |                | 0.4585             |
| $s_{xy}$          |     |            |                | -0.2293             |      |         |                |                    |

$$R = -0.999$$

$$W = W_0 e^{-L/L_0}$$

$$\ln W = \ln W_0 - L/L_0 = 5.74 - L/1.09$$

$$W = 311 \exp(-L/1.09)$$

|                   | $L$  | $\Delta L$ | $(\Delta L)^2$ | $\Delta x \Delta y$ | $W$  | $\ln W$ | $\Delta \ln W$ | $(\Delta \ln W)^2$ |
|-------------------|------|------------|----------------|---------------------|------|---------|----------------|--------------------|
|                   | 3.5  | -1         | 1              | -0.530              | 16   | 2.773   | 0.530          | 0.2809             |
|                   | 4    | -0.5       | 0.25           | -0.142              | 12.5 | 2.526   | 0.283          | 0.0801             |
|                   | 4.5  | 0          | 0              | 0.000               | 9    | 2.197   | -0.046         | 0.0021             |
|                   | 5    | 0.5        | 0.25           | -0.114              | 7.5  | 2.015   | -0.228         | 0.0520             |
|                   | 5.5  | 1          | 1              | -0.538              | 5.5  | 1.705   | -0.538         | 0.2894             |
| $\Sigma$          | 22.5 | 0          | 2.5            | -1.324              |      | 11.216  | 0.001          | 0.7045             |
| $\langle \rangle$ | 4.5  | 0          | 0.5            | -0.2648             |      | 2.243   | 0              | 0.1409             |
| $s_x^2$           |      |            | 0.625          |                     |      |         |                |                    |
| $s_x$             |      |            | 0.791          |                     |      |         |                |                    |
| $s_y^2$           |      |            |                |                     |      |         |                | 0.1761             |
| $s_y$             |      |            |                |                     |      |         |                | 0.4197             |
| $s_{xy}$          |      |            |                | -0.331              |      |         |                |                    |

$$R = -0.997$$

$$W = W_0 e^{-L/L_0}$$

$$\ln W = \ln W_0 - L/L_0 = 4.626 - L/1.89$$

$$W = 102 \exp(-L/1.89)$$

|                   | $L$ | $\Delta L$ | $(\Delta L)^2$ | $\Delta x \Delta y$ | $W$  | $\ln W$ | $\Delta \ln W$ | $(\Delta \ln W)^2$ |
|-------------------|-----|------------|----------------|---------------------|------|---------|----------------|--------------------|
|                   | 3   | -1         | 1              | -0.689              | 28   | 3.332   | 0.689          | 0.4747             |
|                   | 3.5 | -0.5       | 0.25           | -0.1095             | 17.5 | 2.862   | 0.219          | 0.0480             |
|                   | 4   | 0          | 0              | 0                   | 15   | 2.708   | 0.065          | 0.0042             |
|                   | 4.5 | 0.5        | 0.25           | -0.1005             | 11.5 | 2.442   | -0.201         | 0.0404             |
|                   | 5   | 1          | 1              | -0.771              | 6.5  | 1.872   | -0.771         | 0.5944             |
| $\Sigma$          | 20  | 0          | 2.5            | -1.67               |      | 13.216  | 0.001          | 1.1617             |
| $\langle \rangle$ | 4   | 0          | 0.5            | -0.334              |      | 2.643   | 0              | 0.2323             |
| $s_x^2$           |     |            | 0.625          |                     |      |         |                |                    |
| $s_x$             |     |            | 0.791          |                     |      |         |                |                    |
| $s_y^2$           |     |            |                |                     |      |         |                | 0.29               |
| $s_y$             |     |            |                |                     |      |         |                | 0.5389             |
| $s_{xy}$          |     |            |                | -0.4175             |      |         |                |                    |

$$R = -0.979$$

$$W = W_0 e^{-L/L_0}$$

$$\ln W = \ln W_0 - L/L_0 = 5.315 - L/1.497$$

$$W = 203 \exp(-L/1.497)$$

|                   | $L$  | $\Delta L$ | $(\Delta L)^2$ | $\Delta x \Delta y$ | $W$  | $\ln W$ | $\Delta \ln W$ | $(\Delta \ln W)^2$ |
|-------------------|------|------------|----------------|---------------------|------|---------|----------------|--------------------|
|                   | 3.5  | -1         | 1              | -0.564              | 55   | 4.007   | 0.564          | 0.3181             |
|                   | 4    | -0.5       | 0.25           | -0.148              | 42   | 3.738   | 0.295          | 0.0870             |
|                   | 4.5  | 0          | 0              | 0                   | 31   | 3.434   | -0.009         | 0.0001             |
|                   | 5    | 0.5        | 0.25           | -0.192              | 21.3 | 3.059   | -0.384         | 0.1475             |
|                   | 5.5  | 1          | 1              | -0.468              | 19.6 | 2.975   | -0.468         | 0.2190             |
| $\Sigma$          | 22.5 | 0          | 2.5            | -1.372              |      | 17.213  | -0.002         | 0.7717             |
| $\langle \rangle$ | 4.5  | 0          | 0.5            | -0.2744             |      | 3.443   | 0              | 0.1543             |
| $s_x^2$           |      |            | 0.625          |                     |      |         |                |                    |
| $s_x$             |      |            | 0.791          |                     |      |         |                |                    |
| $s_y^2$           |      |            |                |                     |      |         |                | 0.193              |
| $s_y$             |      |            |                |                     |      |         |                | 0.439              |
| $s_{xy}$          |      |            |                | -0.343              |      |         |                |                    |

$$R = -0.988$$

$$W = W_0 e^{-L/L_0}$$

$$\ln W = \ln W_0 - L/L_0 = 5.91 - L/1.824$$

$$W = 368 \exp(-L/1.824)$$

|                   | $L$  | $\Delta L$ | $(\Delta L)^2$ | $\Delta x \Delta y$ | $W$   | $\ln W$ | $\Delta \ln W$ | $(\Delta \ln W)^2$ |
|-------------------|------|------------|----------------|---------------------|-------|---------|----------------|--------------------|
|                   | 3.5  | -1         | 1              | -0.5616             | 15.30 | 2.7278  | 0.5616         | 0.3154             |
|                   | 4    | -0.5       | 0.25           | -0.12795            | 11.27 | 2.4221  | 0.2559         | 0.0655             |
|                   | 4.5  | 0          | 0              | 0                   | 8.37  | 2.1246  | -0.0416        | 0.0017             |
|                   | 5    | 0.5        | 0.25           | -0.13955            | 6.60  | 1.8871  | -0.2791        | 0.0779             |
|                   | 5.5  | 1          | 1              | -0.4966             | 5.31  | 1.6696  | -0.4966        | 0.2466             |
| $\Sigma$          | 22.5 | 0          | 2.5            | -1.3257             |       | 10.8312 | 0.0002         | 0.7071             |
| $\langle \rangle$ | 4.5  | 0          | 0.5            | -0.2651             |       | 2.1662  | 0              | 0.1414             |
| $s_x^2$           |      |            | 0.625          |                     |       |         |                |                    |
| $s_x$             |      |            | 0.791          |                     |       |         |                |                    |
| $s_y^2$           |      |            |                |                     |       |         |                | 0.1768             |
| $s_y$             |      |            |                |                     |       |         |                | 0.4204             |
| $s_{xy}$          |      |            |                | -0.3314             |       |         |                |                    |

$$R = -0.997$$

$$W = W_0 e^{-L/L_0}$$

$$\ln W = \ln W_0 - L/L_0 = 4.5523 - L/1.886$$

$$W = 95 \exp(-L/1.886)$$

|                   | $L$  | $\Delta L$ | $(\Delta L)^2$ | $\Delta x \Delta y$ | $W$   | $\ln W$ | $\Delta \ln W$ | $(\Delta \ln W)^2$ |
|-------------------|------|------------|----------------|---------------------|-------|---------|----------------|--------------------|
|                   | 3.5  | -0.75      | 0.5625         | -0.3465             | 24.47 | 3.197   | 0.462          | 0.2134             |
|                   | 4    | -0.25      | 0.0625         | -0.0348             | 17.71 | 2.874   | 0.139          | 0.0193             |
|                   | 4.5  | 0.25       | 0.0625         | -0.0295             | 13.69 | 2.617   | -0.118         | 0.0139             |
|                   | 5    | 0.75       | 0.5625         | -0.3630             | 9.50  | 2.251   | -0.484         | 0.2343             |
| $\Sigma$          | 17   | 0          | 1.25           | -0.7738             |       | 10.939  | -0.001         | 0.4809             |
| $\langle \rangle$ | 4.25 | 0          | 0.3125         | -0.1935             |       | 2.735   | 0              | 0.1202             |
| $s_x^2$           |      |            | 0.4167         |                     |       |         |                |                    |
| $s_x$             |      |            | 0.6255         |                     |       |         |                |                    |
| $s_y^2$           |      |            |                |                     |       |         |                | 0.1603             |
| $s_y$             |      |            |                |                     |       |         |                | 0.4004             |
| $s_{xy}$          |      |            |                | -0.2579             |       |         |                |                    |

$$R = -0.998$$

$$W = W_0 e^{-L/L_0}$$

$$\ln W = \ln W_0 - L/L_0 = 5.366 - L/1.616$$

$$W = 214 \exp(-L/1.616)$$

|                   | $L$ | $\Delta L$ | $(\Delta L)^2$ | $\Delta x \Delta y$ | $W$ | $\ln W$ | $\Delta \ln W$ | $(\Delta \ln W)^2$ |
|-------------------|-----|------------|----------------|---------------------|-----|---------|----------------|--------------------|
|                   | 3   | -1         | 1              | -0.772              | 17  | 2.833   | 0.772          | 0.5960             |
|                   | 3.5 | -0.5       | 0.25           | -0.1685             | 11  | 2.398   | 0.337          | 0.1136             |
|                   | 4   | 0          | 0              | 0                   | 8   | 2.079   | 0.018          | 0.0003             |
|                   | 4.5 | 0.5        | 0.25           | -0.226              | 5   | 1.609   | -0.452         | 0.2043             |
|                   | 5   | 1          | 1              | -0.3375             | 4   | 1.386   | -0.675         | 0.4556             |
| $\Sigma$          | 20  | 0          | 2.5            | -1.504              |     | 10.305  | 0              | 1.3698             |
| $\langle \rangle$ | 4   | 0          | 0.5            | -0.301              |     | 2.061   | 0              | 0.274              |
| $s_x^2$           |     |            | 0.625          |                     |     |         |                |                    |
| $s_x$             |     |            | 0.791          |                     |     |         |                |                    |
| $s_y^2$           |     |            |                |                     |     |         |                | 0.3425             |
| $s_y$             |     |            |                |                     |     |         |                | 0.5852             |
| $s_{xy}$          |     |            |                | -0.376              |     |         |                |                    |

$$R = -0.812$$

$$W = W_0 e^{-L/L_0}$$

$$\ln W = \ln W_0 - L/L_0 = 4.4674 - L/1.662$$

$$W = 87 \exp(-L/1.662)$$

|                   | $L$  | $\Delta L$ | $(\Delta L)^2$ | $\Delta x \Delta y$ | $W$ | $\ln W$ | $\Delta \ln W$ | $(\Delta \ln W)^2$ |
|-------------------|------|------------|----------------|---------------------|-----|---------|----------------|--------------------|
|                   | 3    | -1.5       | 2.25           | -1.782              | 70  | 4.248   | 1.188          | 1.411              |
|                   | 3.5  | -1         | 1              | -0.629              | 40  | 3.689   | 0.629          | 0.396              |
|                   | 4    | -0.5       | 0.25           | -0.032              | 20  | 2.996   | -0.064         | 0.004              |
|                   | 4.5  | 0          | 0              | 0                   | 18  | 2.890   | -0.17          | 0.029              |
|                   | 5    | 0.5        | 0.25           | -0.1135             | 17  | 2.833   | -0.227         | 0.052              |
|                   | 5.5  | 1          | 1              | -0.494              | 13  | 2.565   | -0.494         | 0.244              |
|                   | 6    | 1.5        | 2.25           | -1.294              | 9   | 2.197   | -0.863         | 0.745              |
| $\Sigma$          | 31.5 | 0          | 7              | -4.345              |     | 21.148  | -0.001         | 2.881              |
| $\langle \rangle$ | 4.5  | 0          | 1              | -0.621              |     | 3.0597  | 0              | 0.412              |
| $s_x^2$           |      |            | 1.1666         |                     |     |         |                |                    |
| $s_x$             |      |            | 1.0801         |                     |     |         |                |                    |
| $s_y^2$           |      |            |                |                     |     |         |                | 0.4892             |
| $s_y$             |      |            |                |                     |     |         |                | 0.69294            |
| $s_{xy}$          |      |            |                | -0.724              |     |         |                |                    |

$$R = -0.967$$

$$W = W_0 e^{-L/L_0}$$

$$\ln W = \ln W_0 - L/L_0 = 5.853 - L/1.611$$

$$W = 348 \exp(-L/1.611)$$
