# Supplementary material for: Ion’s ring current: regularities of the energy density distributions on the main phase of geomagnetic storms
Source: Copernicus journal article supplement (doi:10.5194/angeo-2023-10), 2023-03-28
Supplement: Supplementary file [file angeo-2023-10-AC6-supplement.pdf]

**Table 1**

|    | Satellites         | $E$ , keV | UT                        | MLT   | $\max D_{st} $ , nT | $ D_{st} $ , nT | $L_m$                                                           |
|----|--------------------|-----------|---------------------------|-------|---------------------|-----------------|-----------------------------------------------------------------|
| 1  | Explorer-45        | 1–138     | 21.30 UT<br>Dec 17, 1971  | 23.10 | 171                 | 167             | 3.1<br>(Smith and Hoffman, 1973;<br>Fig. 5, orbit 101, inbound) |
| 2  | Explorer-45        | 1–138     | 14.00 UT<br>Feb 24, 1972  | 22    | 86                  | 83              | 3.5<br>(Fritz et al., 1974;<br>Fig. 2, orbit 314, inbound)      |
| 3  | AMPTE/CCE          | 5–315     | 15.10 UT<br>Sept 04, 1984 | 10.30 | 64                  | 46              | 4.1<br>(Stüdemann et al., 1986;<br>Fig. 3)                      |
| 4  | AMPTE/CCE          | 1–300     | 05.00 UT<br>Sept 05, 1984 | 17.40 | 125                 | 78              | 3.4<br>(Greenspan and Hamilton,<br>2002; Fig. 2a)               |
| 5  | AMPTE/CCE          | 30–310    | 00.20 UT<br>Feb 09, 1986  | 17.30 | 307                 | 273             | 2.8<br>(Hamilton et al., 1988;<br>Fig. 7, pass 5)               |
| 6  | AMPTE/CCE          | 1–300     | 10.00 UT<br>Nov 30, 1988  | 03    | 111                 | 37              | 3.4<br>(Greenspan and Hamilton,<br>2000; Fig. 3a)               |
| 7  | Van Allen Probes B | 10–60     | 09.56 UT<br>Mar 17, 2013  | 19.20 | 132                 | 66              | 3.2<br>(Menz et al., 2017; Fig. 3)                              |
| 8  | Van Allen Probes B | 10–570    | 10.09 UT<br>Mar 17, 2013  | 20    | 132                 | 70              | 3.6<br>(Menz et al., 2017; Fig. 3)                              |
| 9  | Van Allen Probes B | 10–60     | 18.58 UT<br>Mar 17, 2013  | 19.30 | 132                 | 98              | 3.1<br>(Menz et al., 2017; Fig. 3)                              |
| 10 | Van Allen Probes B | 10–570    | 19.00 UT<br>Mar 17, 2013  | 19    | 132                 | 98              | 3.1<br>(Menz et al., 2017; Fig. 3)                              |
| 11 | Van Allen Probes A | 10–60     | 20.08 UT<br>Mar 17, 2013  | 19.30 | 132                 | 117             | 3.0<br>(Menz et al., 2017; Fig. 3)                              |
| 12 | Van Allen Probes B | 1–300     | 07.45 UT<br>June 1, 2013  | 01.20 | 124                 | 122             | 3.0<br>(Kistler et al., 2016; Fig. 6)                           |
| 13 | Van Allen Probes B | 10–600    | 13.10 UT<br>Aug 27, 2014  | 03    | 75                  | 58              | 3.6<br>(Yue et al., 2018; Fig. 1)                               |
| 14 | Van Allen Probes B | 50–200    | 19.30 UT<br>Mar 17, 2015  | 02    | 234                 | 166             | 3.3<br>(Keika et al., 2018; Figs. 4,<br>and 8)                  |
| 15 | Van Allen Probes B | 50–200    | 21.30 UT<br>Mar 17, 2015  | 18    | 234                 | 190             | 3.2<br>(Keika et al., 2018; Figs. 4,<br>and 8)                  |
| 16 | Van Allen Probes A | 1–60      | 23.10 UT<br>Mar 17, 2015  | 03    | 234                 | 233             | 2.7<br>(Menz et al., 2019a; Fig. 1;<br>2019b; Fig. 6)           |
| 17 | Van Allen Probes A | 10–600    | 22.10 UT<br>Mar 6, 2016   | 05    | 99                  | 98              | 3.0<br>(Yue et al., 2019; Fig. 1)                               |
