# Supplementary material for: Ion’s ring current: regularities of the energy density distributions on the main phase of geomagnetic storms
Source: Copernicus journal article supplement (doi:10.5194/angeo-2023-10), 2023-03-28
Supplement: Supplementary file [file angeo-2023-10-AC7-supplement.pdf]

Line 1 in Table 1

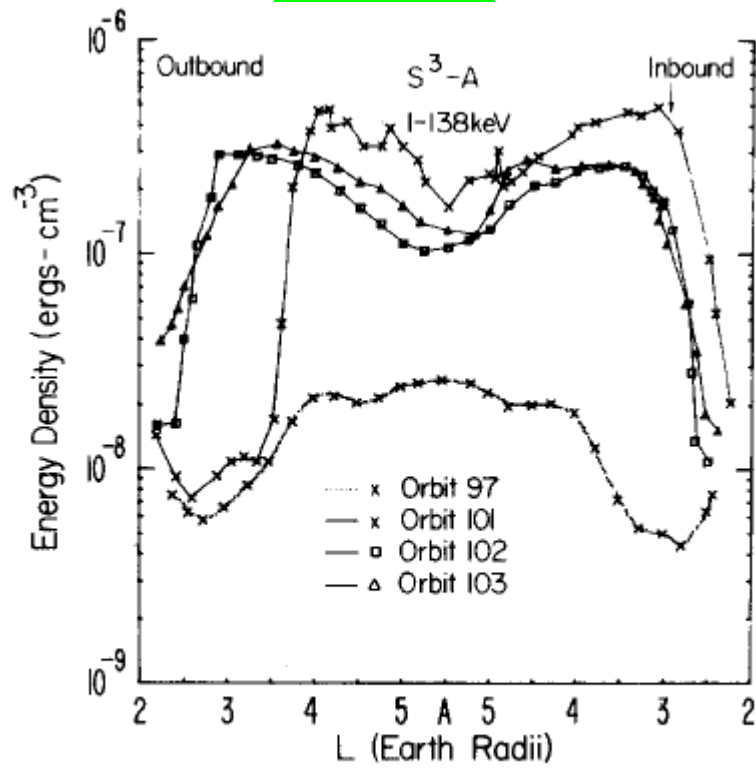

**Fig. 5**

(Smith and Hoffman, 1973)

Line 2 in Table 1

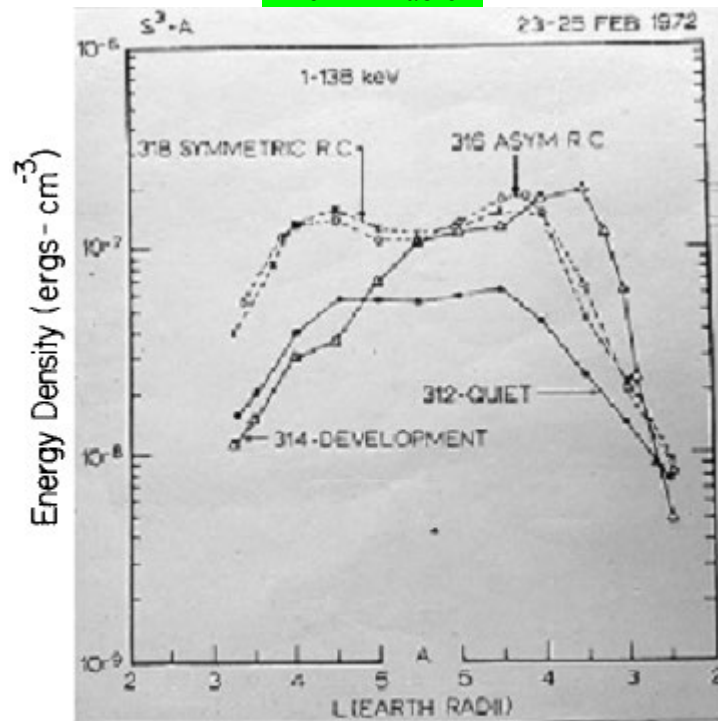

**Fig. 2**

(Fritz et al., 1974)

Line 3 in Table 1

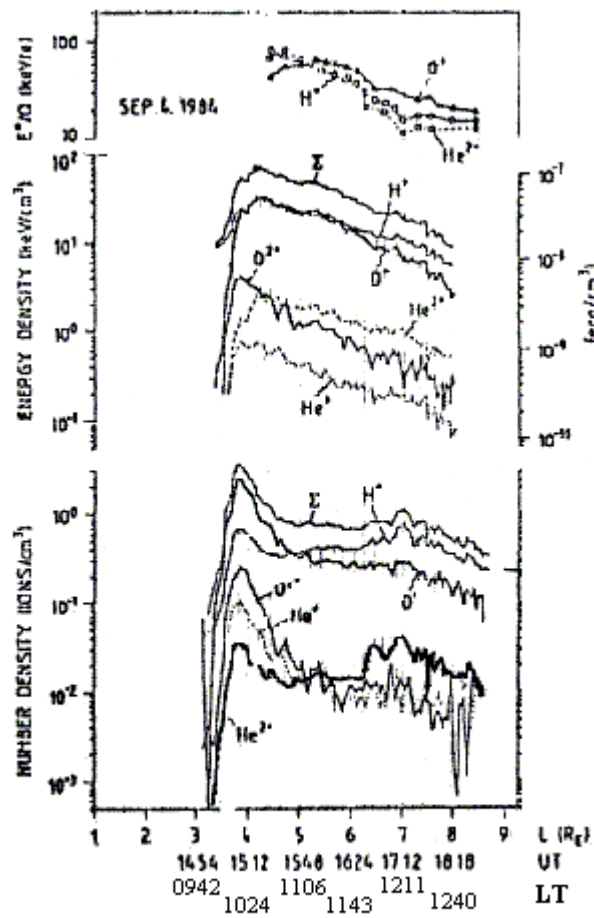

**Fig. 3**

(Stüdemann et al., 1986)

Line 4 in Table 1

Sept 5, 1984 0153-0501 UT

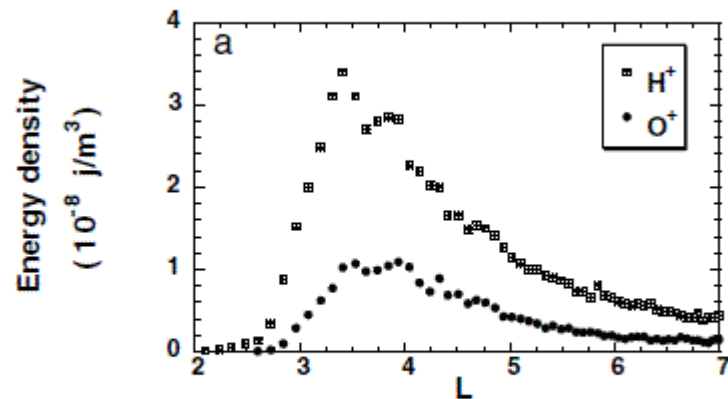

**Fig. 2**

(Greenspan and Hamilton, 2002)

Line 5 in Table 1

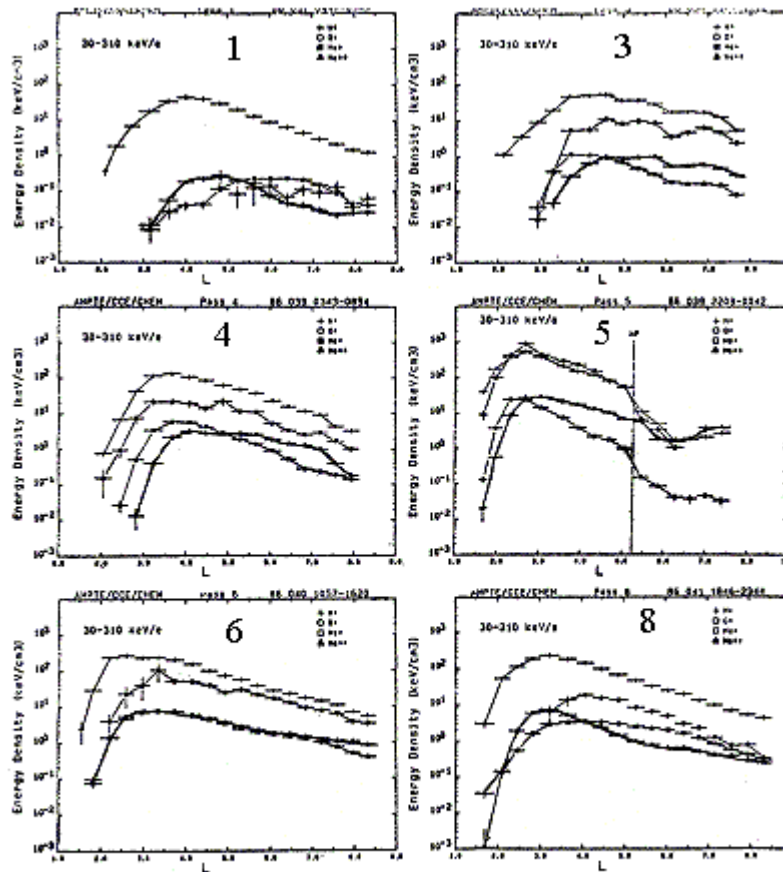

**Fig. 7**

(Hamilton et al., 1988)

Line 6 in Table 1

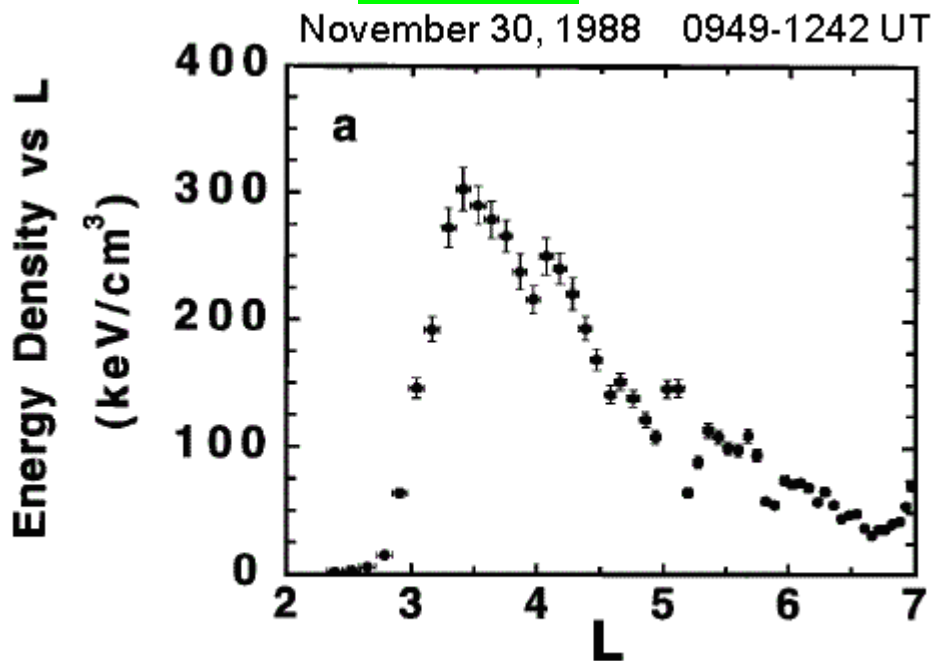

**Fig. 3**

(Greenspan and Hamilton, 2000)

Line 7, 8, 9, 10, and 11 in Table 1

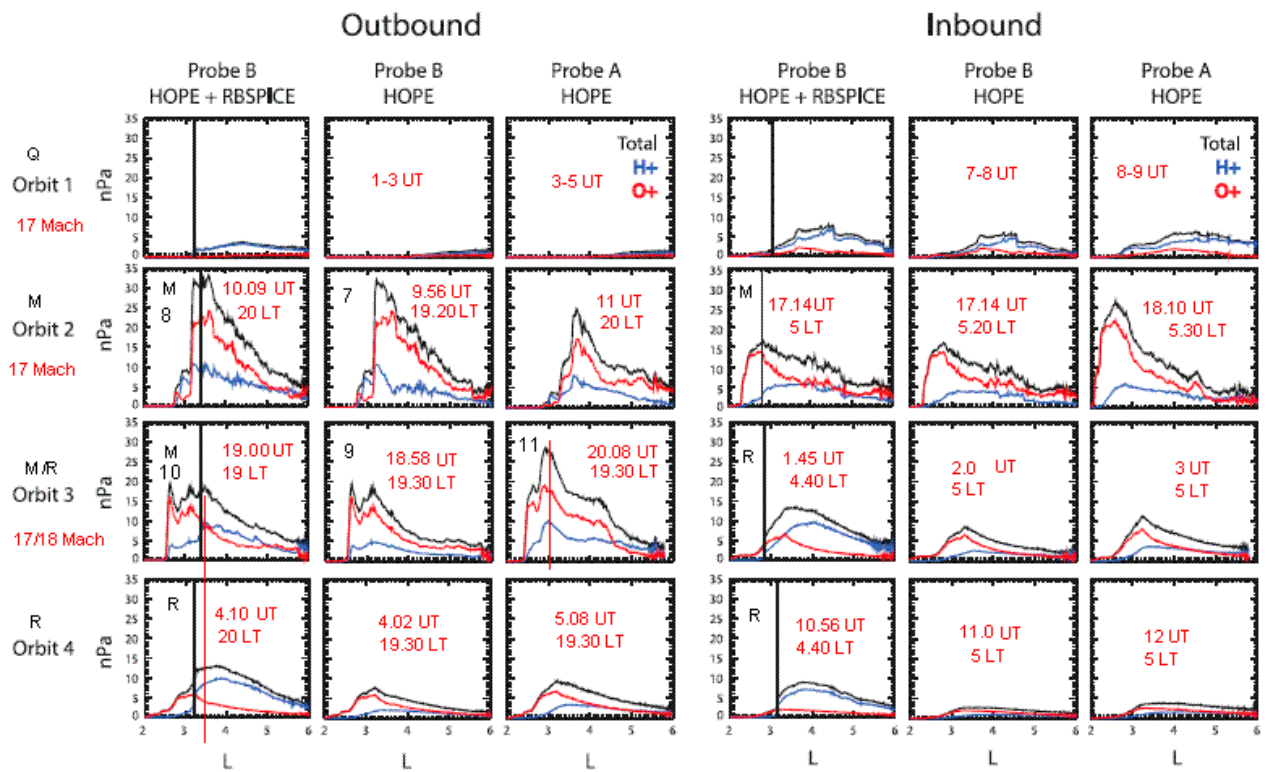

**Fig. 3**  
(Menz et al., 2017)

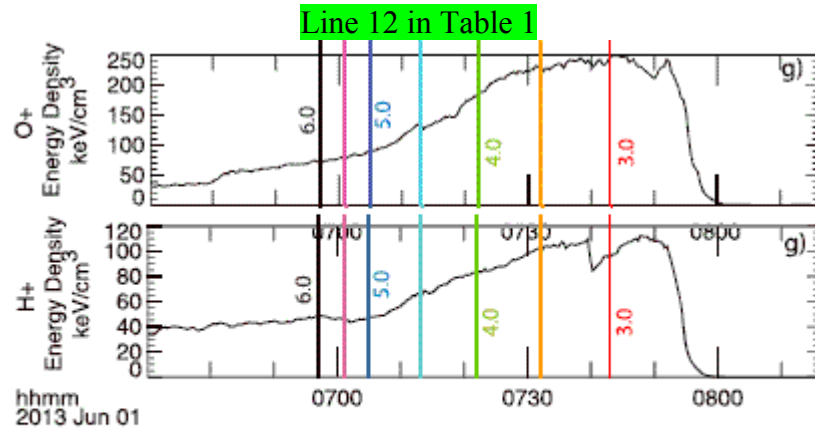

Line 12 in Table 1

**Fig. 6**  
(Kistler et al., 2016)

Line 13 in Table 1

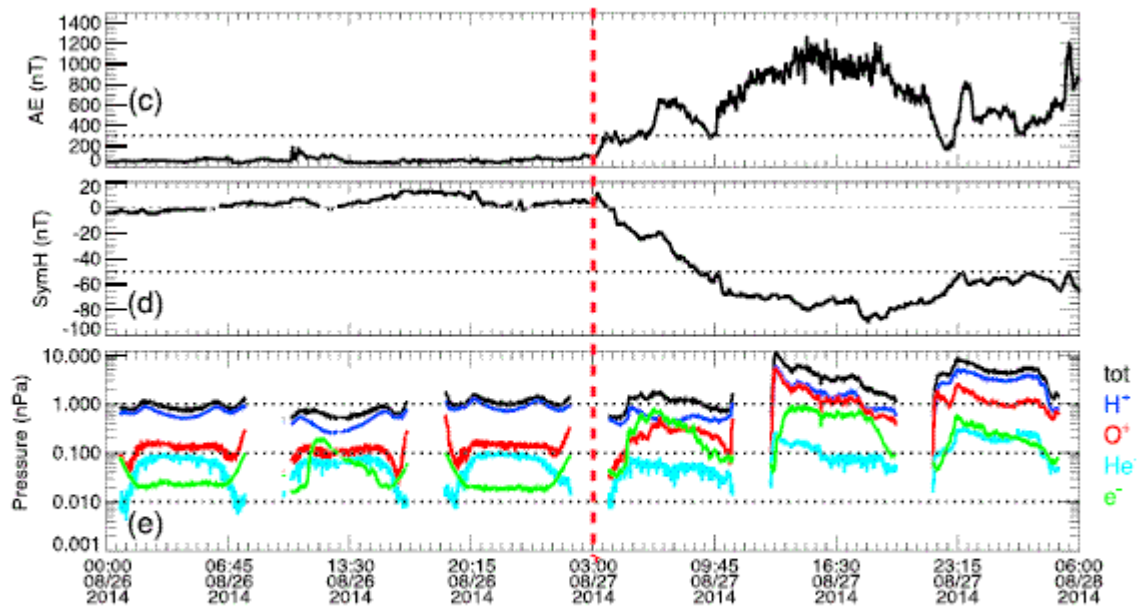

**Fig. 1**

(Yue et al., 2018)

Line 14, and 15 in Table 1

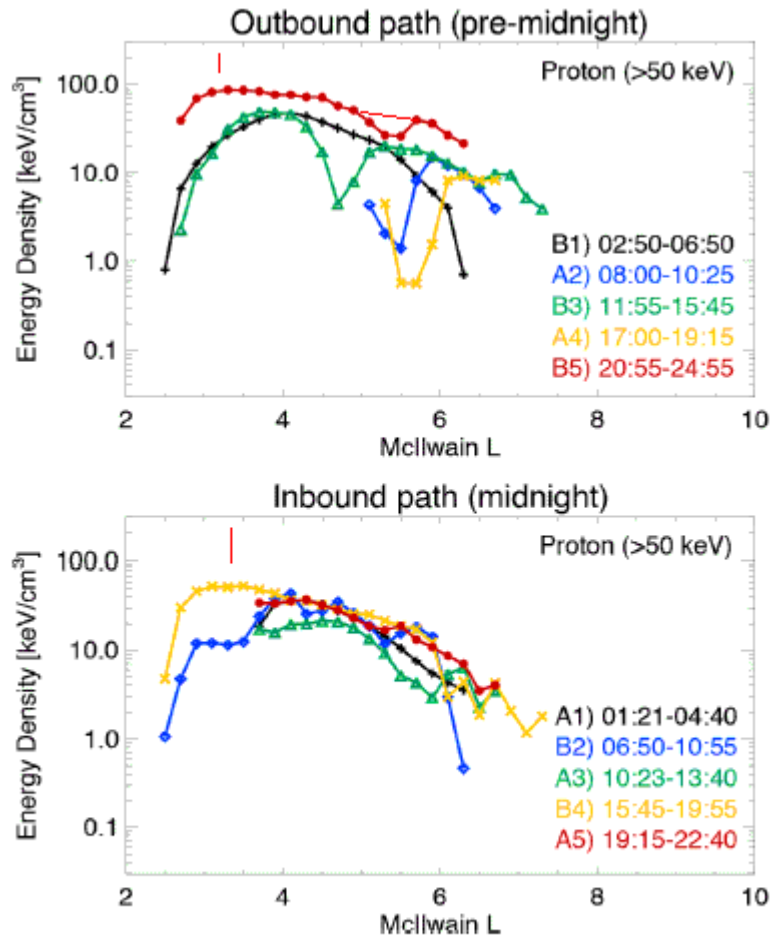

**Fig. 4**

(Keika et al., 2018)

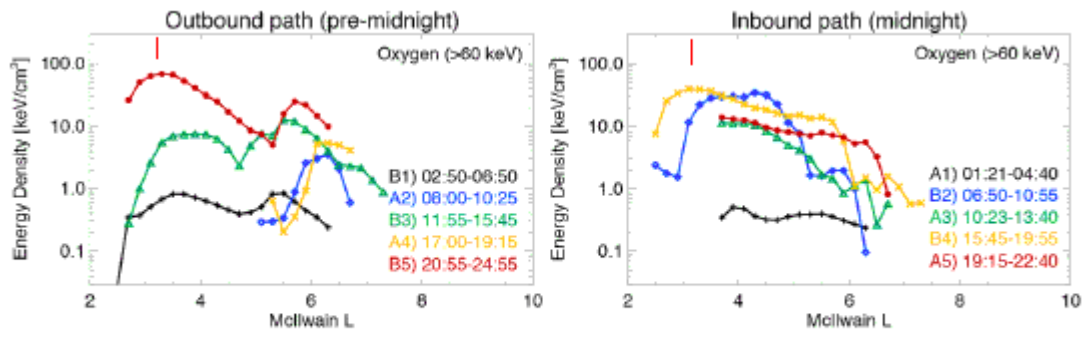

**Fig. 8**  
(Keika et al., 2018)

Line 16 in Table 1

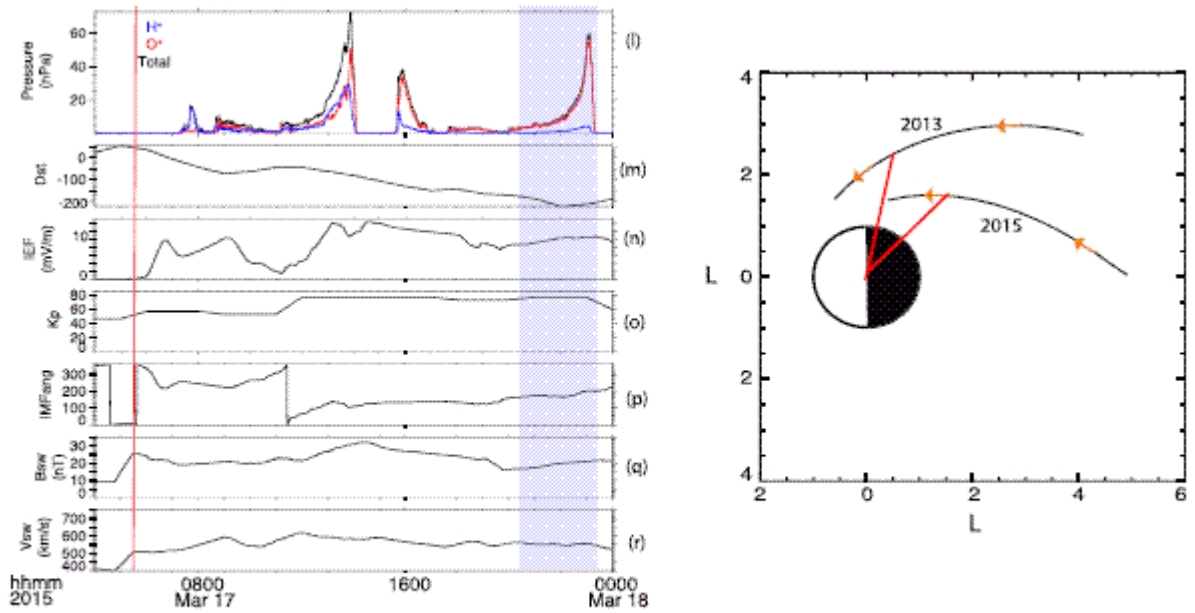

**Fig. 1**  
(Menz et al., 2019a)

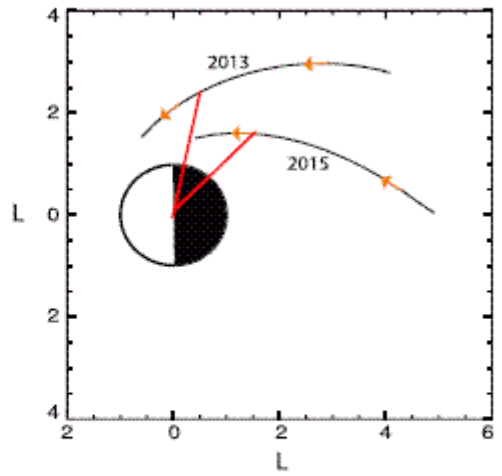

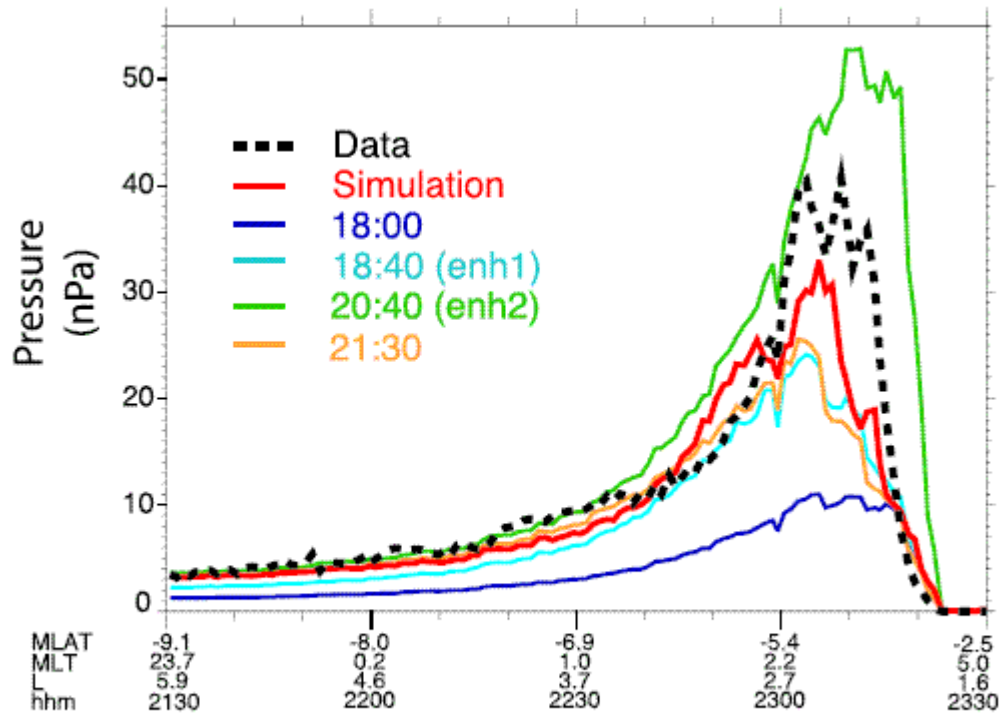

**Fig. 6**

(Menz et al., 2019b)

Line 17 in Table 1

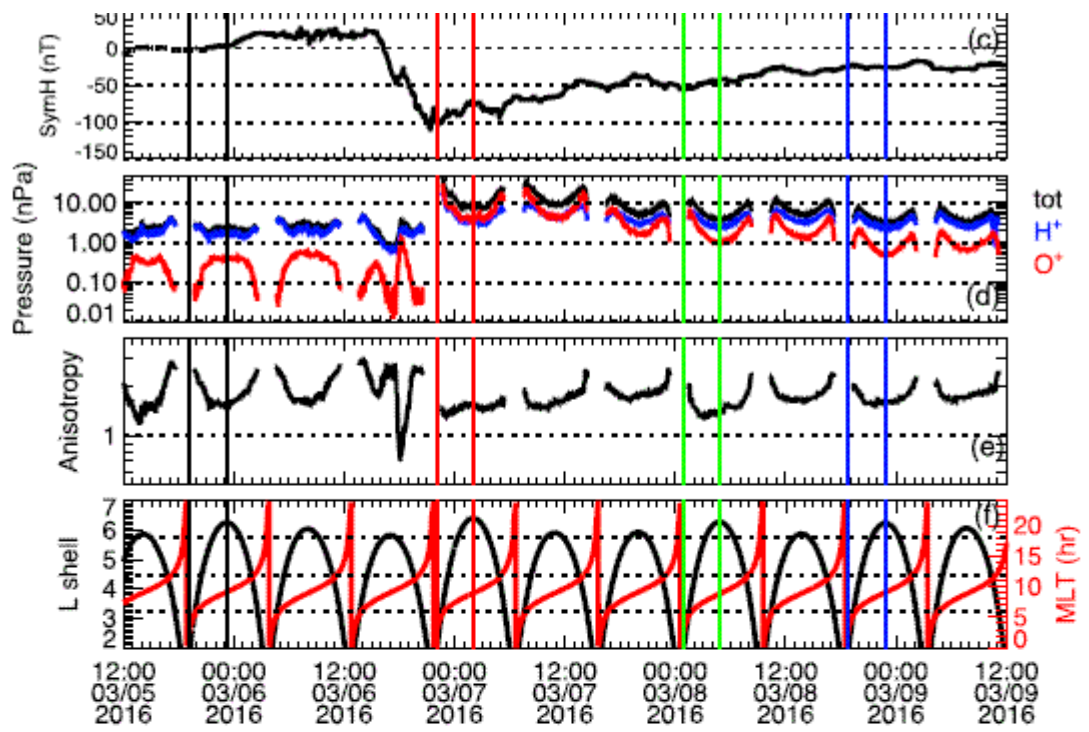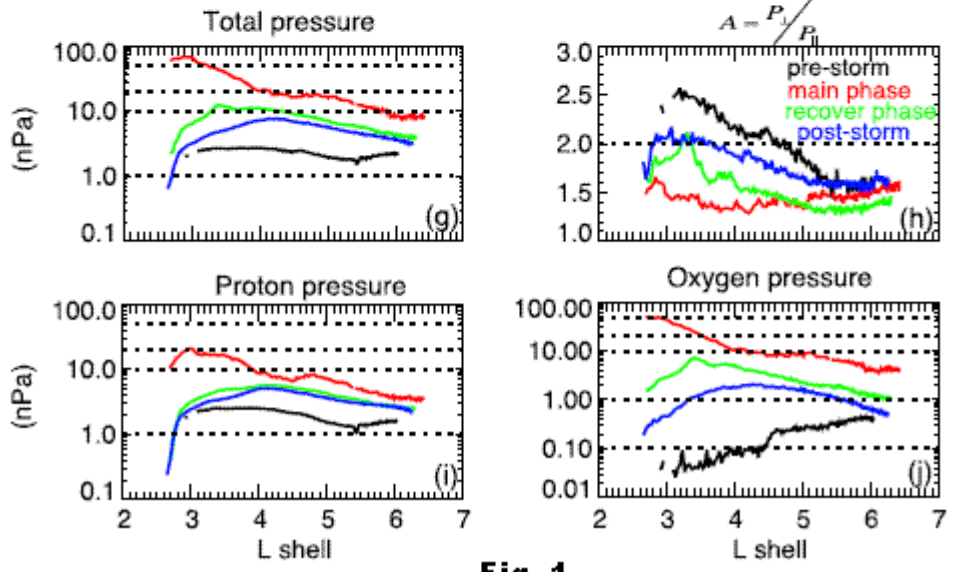

**Fig. 1**

(Yue et al., 2019)
